# Supplementary material
Source: publisher figshare collection journal article supplement (https://acs.figshare.com/ndownloader/files/3798844)
Supplement: Supplementary file 1 [file 3798844]

## SUPPORTING INFORMATION

**Can a Secondary Isotope Effect Be Larger than a Primary?**

Charles L. Perrin\* and Kathryn D. Burke

Department of Chemistry, University of California—San Diego

La Jolla, CA 92093-0358 USA

*cperrin@ucsd.edu***Computational Methods<sup>1</sup>**

**Equations.** Bigeleisen and Mayer derived the relationship between EIEs and partition functions  $Q$  of reactant and product, as expressed in eq S1,<sup>2</sup> where the asterisk signifies isotopic label. Because the EIE is defined as  $K_{\text{light}}/K_{\text{heavy}}$ , the ratio of partition functions must be  $Q/Q^*$ , but eq S1 can be converted to eq S2, with the more familiar ratio  $Q^*/Q$ . The ratio of partition functions of an  $N$ -atomic species can be expressed as a product over all the vibrations, as in eq S3, where  $u_i = h\nu_i/kT$ .

$$\text{EIE} = \left(\frac{Q}{Q^*}\right)_{\text{product}} / \left(\frac{Q}{Q^*}\right)_{\text{reactant}} \quad (\text{S1})$$

$$\text{EIE} = \left(\frac{Q^*}{Q}\right)_{\text{reactant}} / \left(\frac{Q^*}{Q}\right)_{\text{product}} \quad (\text{S2})$$

$$\frac{Q^*}{Q} = \prod^{3N-6} \frac{u_i^*}{u_i} \left(\frac{1 - e^{-u_i}}{1 - e^{-u_i^*}}\right) e^{(u_i - u_i^*)/2} = \text{MMI} \cdot \text{EXC} \cdot \text{ZPE} \quad (\text{S3})$$

The three factors in eq S3—the mass and moment of inertia factor (MMI), the excitation factor (EXC), and the zero-point-energy factor (ZPE)—can all be determined from the vibrational frequencies. The second factor, EXC, represents the contribution from excited vibrational states. These are occupied only for low frequencies or at high temperatures, so that EXC can be ignored, leading to eq S4. The MMI factor of eq S5 is also often ignored, leading to eq S6, in terms of only the ZPE factor. Substituting eq S6 into eq S2 then gives eq S7, expressing the EIE in terms of only ZPEs.

$$\frac{Q^*}{Q} = \prod^{3N-6} \frac{u_i^*}{u_i} e^{(u_i - u_i^*)/2} \quad (\text{S4})$$

$$\text{MMI} = \prod^{3N-6} \frac{u_i^*}{u_i} \quad (\text{S5})$$

$$\frac{Q^*}{Q} \sim \prod^{3N-6} e^{(u_i - u_i^*)/2} \quad (\text{S6})$$

$$\text{EIE} \sim \text{ZPE} \sim \frac{\prod^{3N-6} e^{(u_i - u_i^*)/2}_{\text{reactant}}}{\prod^{3N-6} e^{(u_i - u_i^*)/2}_{\text{product}}} \quad (\text{S7})$$

The MMI factor accounts for the rotational and translational partition functions. The form in eq S5, involving only vibrational frequencies, is convenient for computation. It results from applying the Redlich-Teller product rule to the alternative form in eq S8, where  $m$  is the mass of an atom,  $M$  is the total mass of the species, and  $I_x$ ,  $I_y$ , and  $I_z$  are its moments of inertia along the three principal axes.<sup>3</sup> The contribution of the last two factors of eq S8 to the EIE in eq S2 is the mass factor  $M$  of eq S9. Because the atoms are identical on both sides of a reaction, the ratio of the masses  $m$  must equal 1. Moreover, the factor including the ratio of the total masses,  $M$ , on the two sides of the equation is usually negligibly different from unity. For example, for the EIE on the acidity of formic acid-<sup>18</sup>O the  $M$  factor contributes 1.0014 to both the 1° and 2° EIEs. Therefore the mass factor  $M$  can be ignored, and the major contributor to MMI is the first factor in eq S8. Its contribution to the EIE of eq S2 is then the MI factor of eq S10. Finally, restoring this MI factor, in the form of eq S5, to the overall EIE leads to eq 4.

$$\text{MMI} = \left( \frac{I_x^* I_y^* I_z^*}{I_x I_y I_z} \right)^{1/2} \left( \frac{M^*}{M} \right)^{3/2} \prod^{3N} \left( \frac{m}{m^*} \right)^{1/2} \quad (\text{S8})$$

$$M = \frac{\left( \frac{M^*}{M} \right)^{3/2} \prod^{3N} \left( \frac{m}{m^*} \right)^{1/2}_{\text{reactant}}}{\left( \frac{M^*}{M} \right)^{3/2} \prod^{3N} \left( \frac{m}{m^*} \right)^{1/2}_{\text{product}}} \sim 1 \quad (\text{S9})$$

$$\text{MI} = \frac{\left( \frac{I_x^* I_y^* I_z^*}{I_x I_y I_z} \right)^{1/2}_{\text{reactant}}}{\left( \frac{I_x^* I_y^* I_z^*}{I_x I_y I_z} \right)^{1/2}_{\text{product}}} \quad (\text{S10})$$

$$\text{EIE} = \frac{\prod^{3N-6} \left( \frac{u_i^*}{u_i} \right)_{\text{reactant}} e^{(u_i - u_i^*)/2}_{\text{reactant}}}{\prod^{3N-6} \left( \frac{u_i^*}{u_i} \right)_{\text{product}} e^{(u_i - u_i^*)/2}_{\text{product}}} \quad (4)$$

**Details of Computation.** Calculations were performed on species both with and without constraint to the expected point-group symmetry.<sup>4</sup> If the difference between the unconstrained and constrained energies was  $\leq 10$  cal/mol, the symmetrized structure was used. No scaling factor was applied to vibrational frequencies,<sup>5</sup> because the correction is small and does not affect the comparison here between 1° and 2° EIEs.

The acid/base reactions of formic, nitrous and nitric acids were also calculated using the B3LYP/aug-cc-pVTZ basis set, and the polarized continuum model (PCM) of both chloroform and water, to assess the effect of solvation on the vibrational frequencies and the EIEs. This was repeated for two Lewis acids by calculating the vibrational frequencies of water, nitrosonium ion, carbon dioxide, nitrous acid, and bicarbonate. Each EIE on acidity was calculated using eq 4, excluding the contribution from excitation that is in the central parentheses of eq S3, but including the MMI factor.

Species with a three-fold or higher axis of symmetry, including  $\text{CO}_3^{2-}$ ,  $\text{NO}_3^-$ ,  $\text{BH}_3$ ,  $\text{HB(OH)}_3^-$ ,  $\text{B(OH)}_3$ ,  $\text{H}_3\text{PO}_4$ ,  $\text{PO}_3^-$ ,  $\text{CO}_2$ ,  $\text{B(OH)}_4^-$  and  $\text{PO}_4^{3-}$ , have degenerate frequencies. In some cases, errors in the calculations result in vibrational frequencies that differ slightly. However, these errors are too small to be significant for the calculations herein.

Deprotonation of some acids—borinic (hydroxyborane,  $\text{H}_2\text{BOH}$ ), boronic (dihydroxyborane,  $\text{HB(OH)}_2$ ), boric ( $\text{B(OH)}_3$ ), and phosphenic ( $\text{O}_2\text{POH}$ )—is only hypothetical, since the acid preferentially reacts as a Lewis acid. The calculated energy differences between the Lewis adduct and the Brønsted products (water + Brønsted conjugate base) are listed in Table S1. The strong preference for Lewis acidity is confirmed by the calculations, although it should be mentioned that diarylborinic acids can be deprotonated by butyllithium to  $\text{Ar}_2\text{BO}^-$ .<sup>6</sup>

Table S1. B3LYP/aug-cc-pVTZ energy preference (kcal/mol) for select acids to react as Lewis acids over Brønsted acids.

| Acid HA                | $E(\text{A}^- + \text{H}_2\text{O}) - E(\text{HAOH}^-)$ |
|------------------------|---------------------------------------------------------|
| $\text{H}_2\text{BOH}$ | 25.4                                                    |
| $\text{HB(OH)}_2$      | 17.2                                                    |
| $\text{B(OH)}_3$       | 15.8                                                    |
| $\text{O}_2\text{POH}$ | 24.8                                                    |

**Treatment of Isotopomers and Isomers.** The number of inequivalent oxygen atoms in an acid or conjugate base represents the number of mono- $^{18}\text{O}$  isotopomers for that species. For example, formic acid,  $\text{HCOOH}$ , has two inequivalent oxygen atoms,  $\text{C=O}$  and  $\text{C-OH}$ , which result in two mono- $^{18}\text{O}$  isotopomers depending on which oxygen is labeled. Those have identical electronic energy but different ZPEs. In contrast, some acids or conjugate bases have isotopomers that differ only by single-bond rotation. These are conformational isomers if the structures differ in their electronic energy, or conformational isotopomers if the structures differ only in their ZPEs.

An example of conformational isomers arises in the (hypothetical) deprotonation of boronic acid, which can result in *cis* and *trans* boronate anions, shown in Figure S1. The designations *cis* and *trans* identify the relationship between the hydroxyl proton and the hydrogen on the boron. (Alternatively, these can be designated as *E* and *Z*, respectively, if double-bond

character is associated with the B–OH bond.). These are conformational isomers, which differ in their absolute energies, analogous to the *cis* and *trans* isomers of an amide RCONHR'. The *trans* boronate HB(OH)O<sup>−</sup> is calculated to be more stable than the *cis* by nearly 3 kcal/mol. This difference is inherent in the structures, without any consideration of vibrational ZPE or isotopic substitution. The energy difference corresponds to a strong preference for removal of the *cis* (*E*) proton in boronic acid over the *trans* (*Z*), by a factor of 156 at room temperature. Therefore the *cis* boronate anion can be ignored.

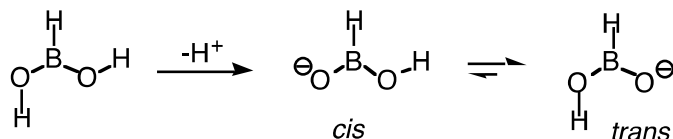

Figure S1. Deprotonation of boronic acid to two conformational isomers of boronate anion.

Conformational isotopomers have the same electronic energy, but because of the isotopic labeling, they differ in ZPE. However, this difference is found to be very small, so that there is a negligible preference for one isotopomer over another, and all are populated nearly equally at room temperature. An example of conformational isotopomers arises with bicarbonate anion. It has three mono-<sup>18</sup>O-labeled isotopomers; two with the <sup>18</sup>O in anionic carbonyls and one with <sup>18</sup>O in the hydroxyl. The hydroxyl oxygen is not equivalent to the carbonyl oxygens, and the isotopomer with <sup>18</sup>O-labeled hydroxyl has a substantially different ZPE, so it is an isotopomer, not a conformational isotopomer, of the other two. In contrast, the two isotopomers with an <sup>18</sup>O-labeled carbonyl have identical electronic energies and differ only by the *trans* or *cis* orientation of <sup>18</sup>O relative to the hydroxyl proton, as shown in Figure S2. These are conformational isotopomers that differ only in their ZPEs. The overall EIE must be an average of the EIEs of these two isotopomers, weighted in principle by their populations. How large is the energetic preference for <sup>18</sup>O in one position over the other? The answer depends on the ZPEs. The *trans* isotopomer is more stable than the *cis*, but by < 3 cal/mol. At room temperature this corresponds to a *trans*:*cis* ratio of 1.004:1. Such a ratio is general for conformational isotopomers, which can be accurately modeled as an equimolar mixture, and their EIEs can be evaluated as simple averages over all the conformational isotopomers.

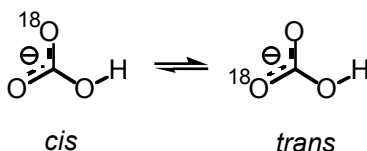

Figure S2. Two conformational isotopomers of bicarbonate anion with <sup>18</sup>O in carbonyl.

**Brønsted Acids Centered on Carbon.** Formic acid in Figure S3 and acetic acid in Figure S4 are straightforward. Formic acid, acetic acid, and acetate were constrained to the C<sub>s</sub> point group, and formate anion was constrained to the C<sub>2v</sub> point group. The deprotonation step for either the 1° or 2° EIE results in the same anion, with equivalent oxygens and the same vibrational frequencies and ZPEs regardless of which oxygen is <sup>18</sup>O-labeled.

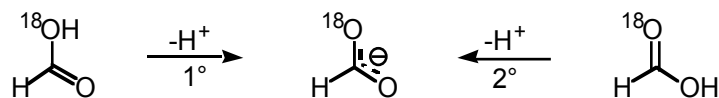

Figure S3. Reactions associated with the primary and secondary EIEs on the acidity of formic acid.

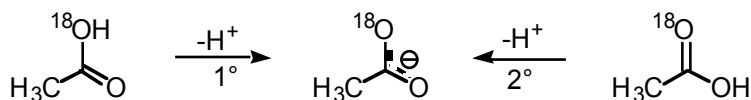

Figure S4. Reactions associated with the primary and secondary EIEs on the acidity of acetic acid.

In highly acidic solutions carboxylic acids can be protonated on the carbonyl oxygen.<sup>7</sup> This was modeled using protonated formic acid, in Figure S5, undergoing deprotonation to formic acid. The lowest-energy form of protonated formic acid has one OH proton *cis* to the C-H and the other OH *trans*. The two formic acid structures formed after deprotonation of one OH or the other are conformational isomers related by single-bond rotation, and they differ considerably in energy. Only the more acidic *cis* proton of protonated formic acid is removed, leading to the formation of the more stable *trans* (*Z*) conformation of formic acid.

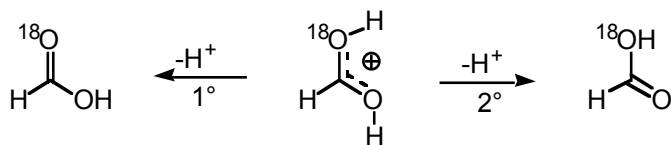

Figure S5. Reactions associated with the primary and secondary EIEs on the acidity of protonated formic acid.

Figure S6 shows the deprotonation of carbonic acid to bicarbonate anion, which can undergo further deprotonation to form carbonate dianion. Carbonic acid has  $C_{2v}$  symmetry, with both protons syn to the C=O.<sup>8</sup> Then identical vibrational frequencies are obtained regardless of which OH is labeled. Bicarbonate has  $C_s$  symmetry, with anionic oxygens that are inequivalent because one oxygen is *cis* to the hydrogen and the other is *trans*. Labeling one or the other of those oxygens then produces two conformational isotopomers, as in Figure S2. Because the total ZPEs of the two conformational isotopomers are calculated to differ by <3 cal/mol, both contribute equally, and both the 1° EIE and the 2° C=O EIE of carbonic acid are averages of EIEs for deprotonation to the *cis* and *trans*  $^{18}\text{O}$ -labeled products.

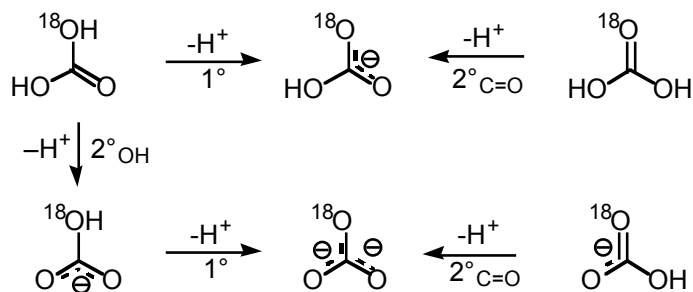

Figure S6. Reactions associated with the one primary and two secondary EIEs on carbonic acid acidity and the primary and secondary EIEs on bicarbonate acidity.

Because carbonate dianion has  $D_{3h}$  symmetry, the vibrational frequencies and ZPEs are the same regardless of the placement of a single  $^{18}\text{O}$  label. The  $1^\circ$  EIE for the deprotonation of bicarbonate anion has only one possible reactant and product, so no averaging is required. The  $2^\circ$  EIE requires averaging over the two possible conformational isotopomers that differ in whether the  $^{18}\text{O}$  is *cis* or *trans* to the OH hydrogen.

**Brønsted Acids Centered on Nitrogen.** Deprotonation of nitrous acid, of  $C_s$  symmetry, to form the nitrite anion, as in Figure S7, is very similar to that of formic acid in Figure S3. There are two mono- $^{18}\text{O}$  isotopomers of nitrous acid, one leading to the  $1^\circ$  EIE and the other leading to the  $2^\circ$  EIE. No averaging is required for either EIE. The nitrite anion has  $C_{2v}$  symmetry, so the vibrational frequencies and ZPEs of the product are identical regardless of the mono-labeled precursor.

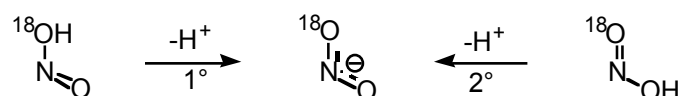

Figure S7. Reactions associated with the primary and secondary EIEs on the acidity of nitrous acid.

The primary and secondary EIEs for deprotonation of nitric acid, of  $C_s$  symmetry, to nitrate anion, as in Figure S8, closely parallel those of bicarbonate in Figure S6. There are three isotopomers of mono- $^{18}\text{O}$  labeled nitric acid, but each one results in the same mono-labeled nitrate anion. The  $1^\circ$  EIE is the result of the unique isotopomer with the  $^{18}\text{O}$  label at the OH position. The  $2^\circ$  EIE requires averaging over two conformational isotopomers, with the  $^{18}\text{O}$  in a nitryl oxygen either *trans* or *cis* to the OH hydrogen.

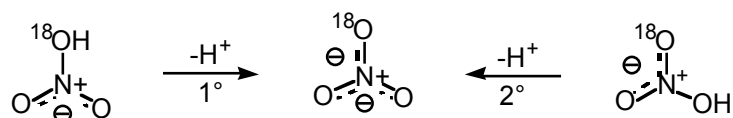

Figure S8. Reactions associated with the primary and secondary EIEs on the acidity of nitric acid.

**Brønsted Acids Centered on Boron.** The next three boron cases are hypothetical and of only comparative and theoretical value. For all of them, as documented in Table S1, deprotonation is less favorable than water addition combined with  $\text{H}^+$  loss, as in eq 3, which is considered later. Deprotonation of borinic acid in Figure S9 has only a  $1^\circ$  EIE. There is only one isotopomer for either the mono- $^{18}\text{O}$  substituted reactant or product.

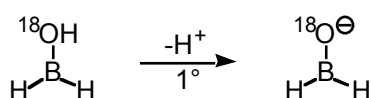

Figure S9. Reaction associated with the primary EIE for deprotonation of borinic acid.

Deprotonation of boronic acid in Figure S10 has some unique features. The lowest-energy conformation of boronic acid has one OH proton *cis* to the BH and one OH proton *trans*, with the *cis,cis* calculated to be 1.8 kcal/mol higher in energy. The two possible deprotonated products are conformational isomers that differ substantially in energy. If the *trans* proton were removed, a less stable anion would result. Therefore, the *cis* OH proton is more acidic than the *trans* and is the only proton removed. This results in a 1° <sup>18</sup>O EIE that comes from deprotonation of the *cis* OH in the conformational isotopomer labeled at the *cis* OH, while the 2° EIE comes from deprotonation of the *cis* OH in the conformational isotopomer labeled at the *trans* OH. Each reaction leads to a different isotopomer of the anion, and all species have C<sub>s</sub> symmetry.

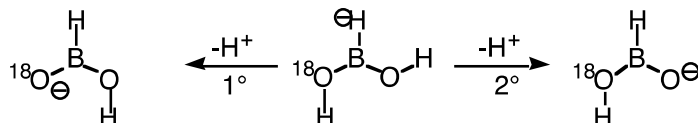

Figure S10. Reactions associated with the primary and secondary EIEs on the acidity of boronic acid.

Deprotonation of boric acid, of C<sub>3h</sub> symmetry, in Figure S11, is straightforward, except that a bond rotation must occur after deprotonation to obtain the lowest-energy anion, *cis,cis* B(OH)<sub>2</sub>O<sup>−</sup>, of C<sub>2v</sub>, symmetry, with both OH protons *cis* to the O<sup>−</sup>. Both the 1° and the 2° <sup>18</sup>O EIE are calculated from the vibrational frequencies of the mono-labeled boric acid and of the species with <sup>18</sup>O in either the anionic oxygen (1°) or in one of the two hydroxylic oxygens, which are equivalent. No averaging is required.

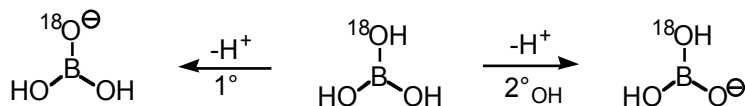

Figure S11. Reactions associated with the primary and secondary EIEs for deprotonation of boric acid.

**Brønsted Acids Centered on Phosphorus.** The deprotonation of phosphinic acid, in Figure S12, to phosphinate is straightforward. Phosphinic acid is not symmetric (C<sub>1</sub> symmetry). The C<sub>s</sub> symmetric structure, with the hydrogen in the OPO plane, can be rejected because it is over 90 cal/mol higher in energy. However, phosphinate anion has C<sub>2v</sub> symmetry, so the anionic phosphoryl oxygen atoms in phosphinate are equivalent, and no averaging is required to obtain either the 1° or 2° <sup>18</sup>O EIE.

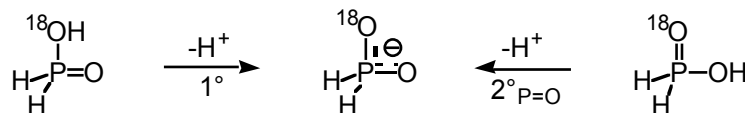

Figure S12. Reactions associated with the primary and secondary EIEs on the acidity of phosphinic acid.

Deprotonation of phosphonic acid, in Figure S13, shows a 1° and two 2° <sup>18</sup>O EIEs. The

$C_1$ -symmetric structure is more stable than the  $C_s$ -symmetric structure, albeit by only 25 cal/mol. The lack of symmetry means that the two mono- $^{18}\text{OH}$  isotopomers of the acid are conformational isotopomers, which differ in ZPE by < 3 cal/mol and so are of comparable acidity. Therefore it is necessary to average over these two conformational isotopomers to calculate the EIEs. Also, because hydrogen phosphonate anion is of  $C_1$  symmetry, there are two conformational isotopomers with  $^{18}\text{O}$  at one or the other phosphoryl oxygen. These differ by whether the  $^{18}\text{O}$  is synperiplanar or anticlinal to the hydroxyl H. Then it is necessary to average over these two conformational isotopomers to calculate the  $1^\circ$  and  $2^\circ$  P=O EIEs. Combining all possibilities from the acid and anion thus requires averaging over four reactions for the  $1^\circ$  EIE, and two reactions for either of the  $2^\circ$  EIEs.

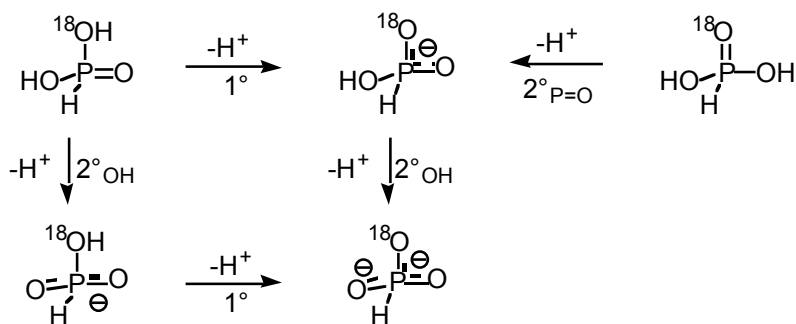

Figure S13. Reactions associated with the primary and secondary EIEs on the acidities of phosphonic acid and hydrogen phosphonate anion.

Phosphoric acid in Figure S14 has  $C_3$  symmetry, so the hydroxyl groups are equivalent. Dihydrogen phosphate anion has  $C_2$  symmetry, with both of the phosphoryl groups and both of the hydroxyl groups equivalent. Therefore no averaging is required for any of the three EIEs.

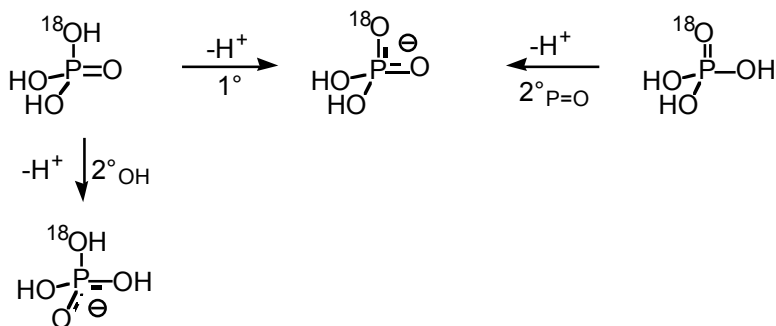

Figure S14. Reactions associated with the primary and secondary EIEs on the acidity of phosphoric acid.

Further deprotonation of dihydrogen phosphate anion of  $C_2$  symmetry, in Figure S15, to hydrogen phosphate dianion, like the first deprotonation of phosphoric acid, has three different EIEs, a  $1^\circ$  and two  $2^\circ$ . Two phosphoryl oxygens in the dianion, of  $C_s$  symmetry, are equivalent and the third is inequivalent because of proximity to the OH hydrogen. Therefore an average must be taken over all three conformational isotopomers, two of which are identical. The  $1^\circ$  and the  $2^\circ$  P=O EIEs both require averaging over the three possible structures. The  $2^\circ$  P-OH EIE does



not require averaging.

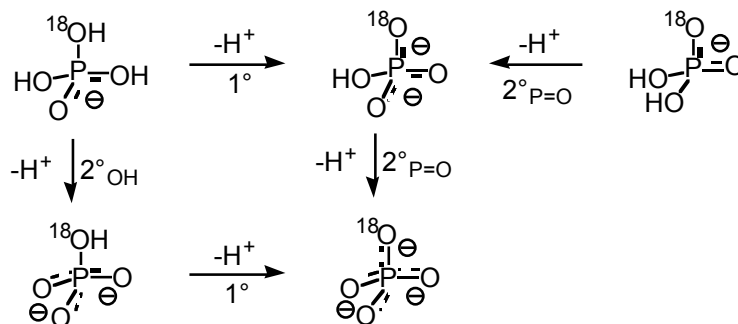

Figure S15. Reactions associated with the primary and secondary EIEs on the acidities of dihydrogen phosphate anion and hydrogen phosphate dianion.

Hydrogen phosphate dianion in Figure S15 can be further deprotonated to phosphate trianion. Because the dianion has  $C_s$  symmetry, it is necessary to average over three conformational isotopomers, two of which are identical. Because the four oxygens in the  $T_d$ -symmetric phosphate trianion are equivalent, no averaging is necessary for the 1° EIE, but there are three 2° EIEs to average.

Deprotonation, of phosphenic acid, in Figure S16, is only hypothetical because this is a Lewis acid. Like bicarbonate anion in Figure S6, phosphenic acid has  $C_s$  symmetry, with phosphoryl oxygens that are inequivalent because of their different relations to the H. Labeling either the *cis* or the *trans* oxygen then produces two conformational isotopomers. The deprotonation product, phosphenate, has  $D_{3h}$  symmetry, so the 1° EIE has only one possible product, and no averaging is required. The 2° EIE requires averaging over the two conformational isotopomers.

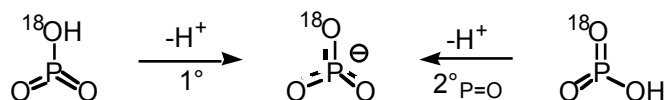

Figure S16. Reactions associated with the primary and secondary EIEs on the acidity of phosphenic acid.

**Lewis Acids Centered on Carbon.** The addition of water to carbon dioxide to form the  $C_s$  bicarbonate anion +  $H^+$ , in Figure S17, has only one 1° EIE, from addition of  $^{18}OH_2$  to unlabeled  $CO_2$ . The 2° EIE must be averaged over the two conformational isotopomers of bicarbonate anion. In these figures, as in subsequent ones, only the net reaction of adding  $OH^-$  to the Lewis acid is shown, although the overall reaction, as in eq 3, is the combination of  $H_2O$  addition and  $H^+$  loss.

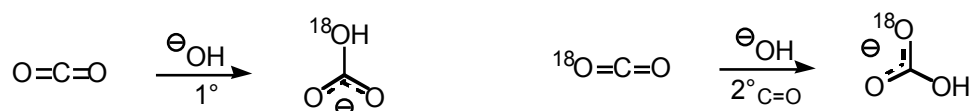

Figure S17. Reactions associated with the primary and secondary EIEs on the Lewis acidity of

carbon dioxide.

**Lewis Acids Centered on Nitrogen.** Nitrosonium ( $\text{NO}^+$ ) and nitronium ( $\text{NO}_2^+$ ) ions can add water, resulting in nitrous and nitric acids, respectively, +  $\text{H}^+$ . The 1° EIEs arise from reaction of unlabeled cation, in Figure S18 or S19, with  $^{18}\text{OH}_2$ , to produce nitrous acid or nitric acid with  $^{18}\text{O}$  in the N–OH. The 2° EIE for  $\text{NO}^+$  arises from reaction of  $^{18}\text{O}$ -labeled nitrosonium ion with unlabeled  $\text{OH}_2$ , to produce nitrous acid with  $^{18}\text{O}$  in the nitryl oxygen. No averaging is necessary. Mono- $^{18}\text{O}$ -labeled nitronium is also a single isotopomer, so no averaging is necessary for its 1° EIE. However, its 2° EIE involves the two conformational isotopomers of nitric acid, in Figure S8, with very similar energies, so that averaging over both is required.

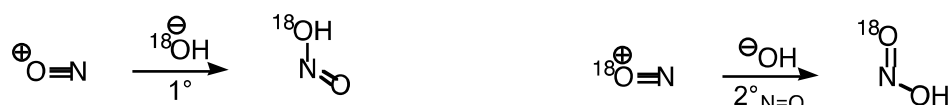

Figure S18. Reactions associated with the primary and secondary EIEs on the Lewis acidity of the nitrosonium cation.

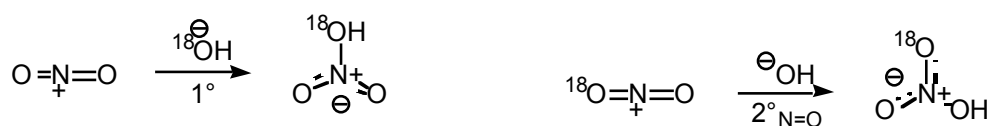

Figure S19. Reactions associated with the primary and secondary EIEs on the Lewis acidity of the nitronium cation.

**Lewis Acids Centered on Boron.** Addition of water to borane, as in Figure S20, shows only a 1° EIE, and no averaging is required.

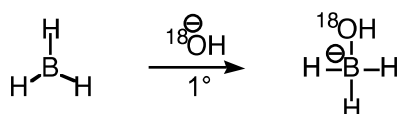

Figure S20. Reaction associated with the primary EIE for borane.

Water addition to borinic acid, as in Figure S21, produces an anion with  $C_2$  symmetry, and calculation of its EIEs requires no averaging.

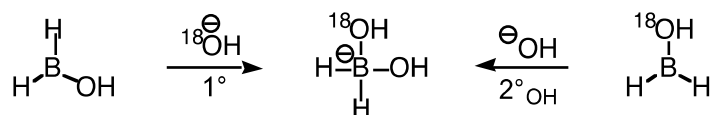

Figure S21. Reactions associated with the primary and secondary EIEs on the Lewis acidity of borinic acid.

Water addition to boronic acid, as in Figure S22, lacks the complexity in Figure S10 of its deprotonation. The two mono- $^{18}\text{O}$  labeled isotopomers of boronic acid are conformational isotopomers, with a ZPE difference of  $< 3$  cal/mol), so they can be averaged. The 1° EIE arises

from addition of  $^{18}\text{OH}_2$  to the unlabeled acid, to form the anion of  $C_3$  symmetry, and no averaging is necessary. The  $2^\circ$  EIE is an average over the two conformational isotopomers of the acid.

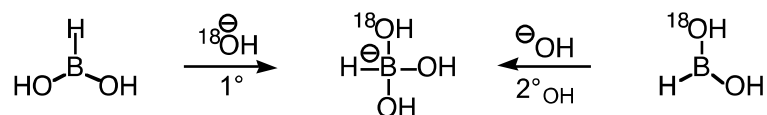

Figure S22. Reactions associated with the primary and secondary EIEs on the Lewis acidity of boronic acid.

For boric acid, in Figure S23, of  $C_{3h}$  symmetry, the  $1^\circ$  EIE arises from addition of  $^{18}\text{OH}_2$ , and the  $2^\circ$  EIE arises from  $\text{OH}_2$  addition to mono- $^{18}\text{O}$ -labeled boric acid. Both reactions lead to the same mono- $^{18}\text{O}$  labeled adduct, of  $S_4$  symmetry, and no averaging is required.

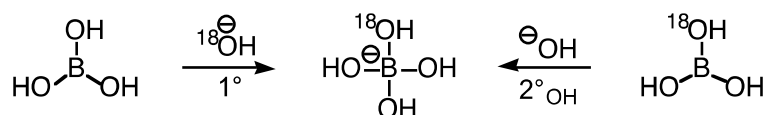

Figure S23. Reactions associated with the primary and secondary EIEs on the Lewis acidity of boric acid.

**Lewis Acids Centered on Phosphorus.** The addition of water to phosphenic acid, in Figure S24, to produce dihydrogen phosphate anion +  $\text{H}^+$ , requires averaging the  $2^\circ$   $\text{P}=\text{O}$  EIE over two conformational isotopomers of the acid. Mono- $^{18}\text{O}$  phosphenic acid has three possible isotopomers, one with  $\text{P}-^{18}\text{OH}$  and two conformational isotopomers where  $\text{P}=\text{O}$  resides either *cis* or *trans* to the  $\text{OH}$  hydrogen. Mono- $^{18}\text{O}$  dihydrogen phosphate anion has  $C_2$  symmetry, so no averaging is required. The EIEs for the  $1^\circ$  and  $2^\circ$   $\text{P}-\text{OH}$  do not require any averaging, but the  $2^\circ$   $\text{P}=\text{O}$  EIE is the average over the two conformational isotopomers of the acid.

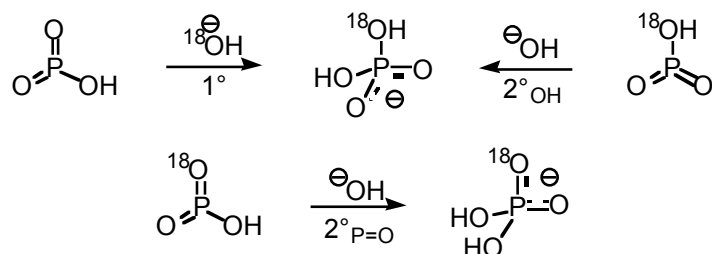

Figure S24. Reactions associated with the primary and secondary EIEs on the Lewis acidity of phosphenic acid.

## Results

Energy, optimized geometry (Cartesian coordinates), and vibrational frequencies obtained for each of the various acids and their conjugate bases are listed below. Although neither the

energy nor the optimized geometry changes with isotopic substitution, vibrational frequencies differ for each mono- $^{18}\text{O}$  isotopologue. Although each of the vibrational frequencies was calculated with four digits after the decimal point, which were retained in all calculations, all tables round to the nearest  $\text{cm}^{-1}$ .

**Water.** Water reacts with each Lewis acid, with loss of  $\text{H}^+$ . It was calculated both in vacuum (Tables S2 and S3) and with solvation (Tables S4-7), using the polarized continuum model (PCM) for solvation by chloroform ( $\text{CHCl}_3$ ) or by water.

Table S2. Energy and optimized coordinates ( $\text{\AA}$ ) for  $\text{H}_2\text{O}$ .

| $E = -76.4661983477 \text{ A.U.}$ |          |           |           |
|-----------------------------------|----------|-----------|-----------|
| Atom                              | $x$      | $y$       | $z$       |
| O                                 | 0.000000 | 0.000000  | 0.116992  |
| H                                 | 0.000000 | 0.763520  | -0.467967 |
| H                                 | 0.000000 | -0.763520 | -0.467967 |

Table S3. Vibrational frequencies ( $\text{cm}^{-1}$ ) for unlabeled and  $^{18}\text{O}$ -labeled water.

| $\text{H}_2^{16}\text{O}$ | $\text{H}_2^{18}\text{O}$ |
|---------------------------|---------------------------|
| 1627                      | 1621                      |
| 3797                      | 3789                      |
| 3899                      | 3883                      |

Table S4. Energy and optimized coordinates ( $\text{\AA}$ ) for  $\text{H}_2\text{O}$ , using the PCM for solvation by chloroform.

| $E = -76.4746962429 \text{ A.U.}$ |          |          |           |
|-----------------------------------|----------|----------|-----------|
| Atom                              | $x$      | $y$      | $z$       |
| O                                 | 0.000000 | 0.000000 | 0.118382  |
|                                   | 0.000000 | 0.766331 | -0.473530 |

|   |          |           |           |
|---|----------|-----------|-----------|
| H | 0.000000 | -0.766331 | -0.473530 |
|---|----------|-----------|-----------|

Table S5. Vibrational frequencies ( $\text{cm}^{-1}$ ) for unlabeled and  $^{18}\text{O}$ -labeled  $\text{H}_2\text{O}$  using the PCM for solvation by chloroform.

| $\text{H}_2^{16}\text{O}$ | $\text{H}_2^{18}\text{O}$ |
|---------------------------|---------------------------|
| 1585                      | 1578                      |
| 3667                      | 3659                      |
| 3747                      | 3731                      |

Table S6. Energy and optimized coordinates ( $\text{\AA}$ ) for  $\text{H}_2\text{O}$  using the PCM for solvation by water.

| $E = -76.4784287664 \text{ A.U.}$ |          |           |           |
|-----------------------------------|----------|-----------|-----------|
| Atom                              | $x$      | $y$       | $z$       |
| O                                 | 0.000000 | 0.000000  | 0.119142  |
| H                                 | 0.000000 | 0.767649  | -0.476570 |
| H                                 | 0.000000 | -0.767649 | -0.476570 |

Table S7. Vibrational frequencies ( $\text{cm}^{-1}$ ) for unlabeled and  $^{18}\text{O}$ -labeled  $\text{H}_2\text{O}$  using the PCM for solvation by water.

| $\text{H}_2^{16}\text{O}$ | $\text{H}_2^{18}\text{O}$ |
|---------------------------|---------------------------|
| 1563                      | 1557                      |
| 3597                      | 3590                      |
| 3663                      | 3648                      |

**Formic Acid, Protonated Formic Acid, and Formate.** Formic acid was calculated under a variety of isotopic substitutions, including deuterium and tritium at both CH and OH. Each of these isotopologues has the same energy and optimized geometry, listed in Table S8, except for those modeled with solvation, in Tables S16 and S18. The vibrational frequencies for the O isotopologues of each acid are in Tables S9, S11-15, S17, and S19. Table S10 presents the

decrease in vibrational frequencies upon mono- $^{18}\text{O}$  labeling. Table S20 presents  $\text{HCOO}^{1/2}\text{H}$  as a hypothetical case in which  $^{1/2}\text{H}$  is a fictitious atom with half the mass of a proton. It models an acid whose OH hydrogen bonds to solvent.

The energy and optimized geometry for protonated formic acid,  $\text{HC}(\text{OH})_2^+$ , and the vibrational frequencies for its mono- $^{18}\text{O}$  isotopologues are included in Tables S21 and S22.

Formate anion was calculated as various CH and  $^{18}\text{O}$  isotopologues, which have identical energy and optimized geometry but different vibrational frequencies, both with and without PCM solvation (Tables S23-S29). Vibrational frequencies for di- $^{18}\text{O}$  labeled formic acid and formate anion are included, but only mono- $^{18}\text{O}$  isotopologues were calculated for all other species.

Table S8. Energy and optimized coordinates (Å) for formic acid and its H-isotopologues,  $\text{HCOOH}$ ,  $\text{HCOOD}$ ,  $\text{HCOOT}$ ,  $\text{DCOOH}$ ,  $\text{DCOOD}$ ,  $\text{DCOOT}$ , and  $\text{HCOO}^{1/2}\text{H}$ .

| $E = -189.845117682 \text{ A.U.}$ |           |           |          |
|-----------------------------------|-----------|-----------|----------|
| Atom                              | $x$       | $y$       | $z$      |
| C                                 | 0.000000  | 0.421051  | 0.000000 |
| O                                 | -1.028178 | -0.446130 | 0.000000 |
| O                                 | 1.158545  | 0.117328  | 0.000000 |
| H                                 | -0.383223 | 1.447894  | 0.000000 |
| H                                 | -0.659714 | -1.343779 | 0.000000 |

Table S9. Vibrational frequencies ( $\text{cm}^{-1}$ ) for all O isotopologues of formic acid,  $\text{HCOOH}$ .

| $^{16}\text{O}_2$ | $\text{C}-^{18}\text{OH}$ | $\text{X}=^{18}\text{O}$ | $^{18}\text{O}_2$ |
|-------------------|---------------------------|--------------------------|-------------------|
| 629               | 620                       | 616                      | 607               |
| 675               | 670                       | 674                      | 669               |
| 1052              | 1051                      | 1050                     | 1049              |
| 1121              | 1091                      | 1117                     | 1088              |
| 1298              | 1292                      | 1296                     | 1290              |
| 1402              | 1400                      | 1395                     | 1393              |

|      |      |      |      |
|------|------|------|------|
| 1811 | 1810 | 1775 | 1774 |
| 3048 | 3048 | 3048 | 3048 |
| 3716 | 3704 | 3716 | 3704 |

Table S10. Decrease in calculated vibrational frequencies ( $\text{cm}^{-1}$ ) of formic acid upon mono- $^{18}\text{O}$  labeling.

| $\nu$ | Mode                      | $\Delta\nu_{^{18}\text{OH}}$ | $\Delta\nu_{\text{C}=\text{O}}$ |
|-------|---------------------------|------------------------------|---------------------------------|
| 3716  | $\nu_{\text{OH}}$         | 11.6                         | 0.0                             |
| 3048  | $\nu_{\text{CH}}$         | 0.0                          | 0.0                             |
| 1811  | $\nu_{\text{C}=\text{O}}$ | 0.6                          | 36.2                            |
| 1402  | $\delta_{\text{CH}}$      | 2.2                          | 6.8                             |
| 1298  | $\delta_{\text{OH}}$      | 6.0                          | 1.9                             |
| 1121  | $\nu_{\text{C}-\text{O}}$ | 30.1                         | 3.8                             |
| 1052  | $\gamma_{\text{CH}}$      | 0.8                          | 1.9                             |
| 675   | $\pi_{\text{OH}}$         | 4.3                          | 1.0                             |
| 629   | $\delta_{\text{OCO}}$     | 8.3                          | 12.6                            |
| Sum   |                           | 63.9                         | 64.1                            |

Table S11. Vibrational frequencies ( $\text{cm}^{-1}$ ) for O isotopologues of formic acid-OD, HCOOD.

| $^{16}\text{O}_2$ | $\text{C}-^{18}\text{OH}$ | $\text{C}=\text{O}$ |
|-------------------|---------------------------|---------------------|
| 531               | 525                       | 529                 |
| 561               | 558                       | 551                 |
| 999               | 973                       | 992                 |
| 1050              | 1049                      | 1048                |

|      |      |      |
|------|------|------|
| 1186 | 1169 | 1184 |
| 1392 | 1392 | 1387 |
| 1805 | 1805 | 1768 |
| 2702 | 2685 | 2702 |
| 3049 | 3049 | 3049 |

Table S12. Vibrational frequencies (cm<sup>-1</sup>) for O78, HCOOT.

| <sup>16</sup> O <sub>2</sub> | C- <sup>18</sup> OH | C= <sup>18</sup> O |
|------------------------------|---------------------|--------------------|
| 473                          | 467                 | 471                |
| 506                          | 505                 | 497                |
| 931                          | 906                 | 923                |
| 1049                         | 1048                | 1047               |
| 1171                         | 1153                | 1170               |
| 1391                         | 1391                | 1385               |
| 1804                         | 1803                | 1766               |
| 2269                         | 2248                | 2269               |
| 3049                         | 3049                | 3048               |

Table S13. Vibrational frequencies (cm<sup>-1</sup>) for O isotopologues of formic-*d* acid, DCOOH.

| <sup>16</sup> O <sub>2</sub> | C- <sup>18</sup> OH | C= <sup>18</sup> O |
|------------------------------|---------------------|--------------------|
| 623                          | 615                 | 610                |
| 664                          | 660                 | 663                |
| 886                          | 884                 | 883                |
| 985                          | 972                 | 983                |



|      |      |      |
|------|------|------|
| 1157 | 1137 | 1149 |
| 1294 | 1287 | 1292 |
| 1779 | 1778 | 1742 |
| 2267 | 2267 | 2265 |
| 3716 | 3704 | 3716 |

Table S14. Vibrational frequencies ( $\text{cm}^{-1}$ ) for O isotopologues of formic-*d* acid-OD, DCOOD.

| $^{16}\text{O}_2$ | C- $^{18}\text{OH}$ | C= $^{18}\text{O}$ |
|-------------------|---------------------|--------------------|
| 513               | 508                 | 512                |
| 557               | 554                 | 547                |
| 886               | 884                 | 883                |
| 960               | 939                 | 957                |
| 1049              | 1040                | 1043               |
| 1179              | 1164                | 1175               |
| 1775              | 1774                | 1738               |
| 2266              | 2266                | 2264               |
| 2702              | 2686                | 2702               |

Table S15. Vibrational frequencies ( $\text{cm}^{-1}$ ) for O isotopologues of formic-*d* acid-OT, DCOOT.

| $^{16}\text{O}_2$ | C- $^{18}\text{OH}$ | C= $^{18}\text{O}$ |
|-------------------|---------------------|--------------------|
| 451               | 446                 | 451                |
| 503               | 502                 | 495                |
| 886               | 884                 | 883                |
| 918               | 894                 | 912                |

|      |      |      |
|------|------|------|
| 1012 | 1006 | 1008 |
| 1173 | 1157 | 1168 |
| 1774 | 1773 | 1737 |
| 2260 | 2246 | 2259 |
| 2274 | 2268 | 2273 |

Table S16. Energy and optimized coordinates (Å) of formic acid, HCOOH, using the PCM for solvation by chloroform.

| $E = -189.856535535$ A.U. |           |           |          |
|---------------------------|-----------|-----------|----------|
| Atom                      | $x$       | $y$       | $z$      |
| C                         | 0.000000  | 0.419408  | 0.000000 |
| O                         | -1.030693 | -0.428245 | 0.000000 |
| O                         | 1.162168  | 0.100745  | 0.000000 |
| H                         | -0.360210 | 1.457017  | 0.000000 |
| H                         | -0.691591 | -1.353462 | 0.000000 |

Table S17. Vibrational frequencies ( $\text{cm}^{-1}$ ) for O isotopologues of formic acid, HCOOH, using the PCM for solvation by chloroform.

| $^{16}\text{O}_2$ | C- $^{18}\text{OH}$ | C= $^{18}\text{O}$ |
|-------------------|---------------------|--------------------|
| 635               | 627                 | 622                |
| 657               | 653                 | 656                |
| 1061              | 1060                | 1059               |
| 1128              | 1098                | 1124               |
| 1293              | 1286                | 1291               |
| 1400              | 1398                | 1393               |

|      |      |      |
|------|------|------|
| 1760 | 1759 | 1726 |
| 3009 | 3009 | 3009 |
| 3399 | 3388 | 3399 |

Table S18. Energy and optimized coordinates (Å) of formic acid, HCOOH, using the PCM for solvation by water.

| $E = -189.861654500$ A.U. |           |           |          |
|---------------------------|-----------|-----------|----------|
| Atom                      | $x$       | $y$       | $z$      |
| C                         | 0.000000  | 0.418245  | 0.000000 |
| O                         | -1.032194 | -0.419706 | 0.000000 |
| O                         | 1.163938  | 0.093270  | 0.000000 |
| H                         | -0.350009 | 1.460884  | 0.000000 |
| H                         | -0.703939 | -1.358867 | 0.000000 |

Table S19. Vibrational frequencies ( $\text{cm}^{-1}$ ) for O isotopologues of formic acid, HCOOH, using the PCM for solvation by water.

| $^{16}\text{O}_2$ | C- $^{18}\text{OH}$ | C= $^{18}\text{O}$ |
|-------------------|---------------------|--------------------|
| 638               | 630                 | 625                |
| 644               | 640                 | 643                |
| 1065              | 1064                | 1063               |
| 1130              | 1099                | 1126               |
| 1285              | 1277                | 1284               |
| 1399              | 1397                | 1392               |
| 1736              | 1736                | 1703               |
| 2984              | 2983                | 2983               |

|      |      |      |
|------|------|------|
| 3192 | 3182 | 3192 |
|------|------|------|

Table S20. Vibrational frequencies ( $\text{cm}^{-1}$ ) for O isotopologues of formic acid- $\text{O}^{1/2}\text{H}$ ,  $\text{HCOO}^{1/2}\text{H}$ .

| $^{16}\text{O}_2$ | $\text{C}-^{18}\text{OH}$ | $\text{C}=\text{}^{18}\text{O}$ |
|-------------------|---------------------------|---------------------------------|
| 663               | 651                       | 649                             |
| 890               | 887                       | 889                             |
| 1063              | 1063                      | 1062                            |
| 1149              | 1120                      | 1146                            |
| 1385              | 1385                      | 1380                            |
| 1665              | 1661                      | 1646                            |
| 1862              | 1860                      | 1841                            |
| 3048              | 3048                      | 3048                            |
| 5201              | 5193                      | 5201                            |

Table S21. Energy and optimized coordinates ( $\text{\AA}$ ) of protonated formic acid,  $\text{HC}(\text{OH})_2^+$ .

| $E = -190.139682836 \text{ A.U.}$ |           |           |          |
|-----------------------------------|-----------|-----------|----------|
| Atom                              | $x$       | $y$       | $z$      |
| C                                 | 0.000000  | 0.425878  | 0.000000 |
| O                                 | -1.145431 | -0.105207 | 0.000000 |
| O                                 | 1.049173  | -0.292999 | 0.000000 |
| H                                 | 0.028761  | 1.514045  | 0.000000 |
| H                                 | -1.148805 | -1.086026 | 0.000000 |
| H                                 | 1.890103  | 0.202362  | 0.000000 |

Table S22. Vibrational frequencies ( $\text{cm}^{-1}$ ) for O isotopologues of protonated formic acid,  $\text{HC}(\text{OH})_2^+$ , where *cis* and *trans* represent the relationship between the CH and OH protons.

| $^{16}\text{O}_2$ | $\text{C}^{18}\text{OH}$ ( <i>cis</i> ) | $\text{C}^{18}\text{OH}$ ( <i>trans</i> ) |
|-------------------|-----------------------------------------|-------------------------------------------|
| 608               | 598                                     | 600                                       |
| 658               | 655                                     | 658                                       |
| 774               | 774                                     | 768                                       |
| 1090              | 1088                                    | 1089                                      |
| 1169              | 1165                                    | 1160                                      |
| 1187              | 1177                                    | 1172                                      |
| 1363              | 1347                                    | 1362                                      |
| 1463              | 1454                                    | 1452                                      |
| 1691              | 1685                                    | 1679                                      |
| 3166              | 3166                                    | 3166                                      |
| 3593              | 3592                                    | 3581                                      |
| 3659              | 3647                                    | 3659                                      |

Table S23. Energy and optimized coordinates ( $\text{\AA}$ ) for formate,  $\text{HCO}_2^-$ , and formate-*d*,  $\text{DCO}_2^-$ , anions.

| $E = -189.288234807 \text{ A.U.}$ |          |           |           |
|-----------------------------------|----------|-----------|-----------|
| Atom                              | $x$      | $y$       | $z$       |
| C                                 | 0.000000 | 0.000000  | 0.315782  |
| O                                 | 0.000000 | 1.135734  | -0.209106 |
| O                                 | 0.000000 | -1.135734 | -0.209106 |
| H                                 | 0.000000 | 0.000000  | 1.451001  |

Table S24. Vibrational frequencies ( $\text{cm}^{-1}$ ) for O isotopologues of formate anion,  $\text{HCO}_2^-$ .

| $^{16}\text{O}_2$ | $\text{C}^{18}\text{O}$ | $^{18}\text{O}_2$ |
|-------------------|-------------------------|-------------------|
| 744               | 729                     | 714               |
| 1042              | 1040                    | 1038              |
| 1338              | 1315                    | 1295              |
| 1371              | 1368                    | 1364              |
| 1649              | 1637                    | 1624              |
| 2573              | 2573                    | 2573              |

Table S25. Vibrational frequencies ( $\text{cm}^{-1}$ ) for O isotopologues of formate-*d* anion,  $\text{DCO}_2^-$ .

| $^{16}\text{O}_2$ | $\text{C}^{18}\text{O}$ |
|-------------------|-------------------------|
| 737               | 722                     |
| 902               | 899                     |
| 1005              | 1001                    |
| 1325              | 1302                    |
| 1646              | 1634                    |
| 1877              | 1877                    |

Table S26. Energy and optimized coordinates ( $\text{\AA}$ ) of formate anion,  $\text{HCO}_2^-$ , using the PCM for solvation by chloroform.

| $E = -189.375445734 \text{ A.U.}$ |          |           |           |
|-----------------------------------|----------|-----------|-----------|
| Atom                              | $x$      | $y$       | $z$       |
| C                                 | 0.000000 | 0.000000  | 0.329956  |
| O                                 | 0.000000 | 1.129703  | -0.214365 |
| O                                 | 0.000000 | -1.129703 | -0.214365 |
| H                                 | 0.000000 | 0.000000  | 1.450108  |

Table S27. Vibrational frequencies ( $\text{cm}^{-1}$ ) for O isotopologues of formate anion,  $\text{HCO}_2^-$ , using the PCM for solvation by chloroform.

| $^{16}\text{O}_2$ | $\text{C}^{18}\text{O}$ |
|-------------------|-------------------------|
| 739               | 724                     |
| 1059              | 1057                    |
| 1350              | 1325                    |
| 1385              | 1382                    |
| 1605              | 1594                    |
| 2733              | 2733                    |

Table S28. Energy and optimized coordinates ( $\text{\AA}$ ) for formate anion,  $\text{HCO}_2^-$ , using the PCM for solvation by water.

| $E = -189.398019909 \text{ A.U.}$ |          |           |           |
|-----------------------------------|----------|-----------|-----------|
| Atom                              | $x$      | $y$       | $z$       |
| C                                 | 0.000000 | 0.000000  | 0.336238  |
| O                                 | 0.000000 | 1.127147  | -0.216869 |
| O                                 | 0.000000 | -1.127147 | -0.216869 |
| H                                 | 0.000000 | 0.000000  | 1.452472  |

Table S29. Vibrational frequencies ( $\text{cm}^{-1}$ ) for O isotopologues of formate anion,  $\text{HCO}_2^-$ , using the PCM for solvation by water.

| $^{16}\text{O}_2$ | $\text{C}^{18}\text{O}$ |
|-------------------|-------------------------|
| 735               | 720                     |
| 1064              | 1062                    |
| 1351              | 1326                    |

1384    1382

1581    1571

2774    2774

**Acetic Acid and Acetate.** The energy and optimized geometry for acetic acid and acetate anion and the vibrational frequencies for their mono- $^{18}\text{O}$  isotopologues are included in Tables S30-S33.

Table S30. Energy and optimized coordinates (Å) for acetic acid,  $\text{CH}_3\text{COOH}$ .

| <u><math>E = -229.185826803 \text{ A.U.}</math></u> |                       |                       |                       |
|-----------------------------------------------------|-----------------------|-----------------------|-----------------------|
| <u>Atom</u>                                         | <u><math>x</math></u> | <u><math>y</math></u> | <u><math>z</math></u> |
| O                                                   | -0.177979             | 1.345665              | 0.000000              |
| O                                                   | 1.241742              | -0.392899             | 0.000000              |
| C                                                   | 0.000000              | 0.155272              | 0.000000              |
| C                                                   | -1.069439             | -0.899095             | 0.000000              |
| H                                                   | 1.874810              | 0.340146              | 0.000000              |
| H                                                   | -2.046447             | -0.427450             | 0.000000              |
| H                                                   | -0.960916             | -1.535944             | 0.877880              |
| H                                                   | -0.960916             | -1.535944             | -0.877880             |

Table S31. Vibrational frequencies ( $\text{cm}^{-1}$ ) for O isotopologues of acetic acid,  $\text{CH}_3\text{COOH}$

| <u><math>^{16}\text{O}_2</math></u> | <u><math>\text{C}-^{18}\text{OH}</math></u> | <u><math>\text{C}=^{18}\text{O}</math></u> |
|-------------------------------------|---------------------------------------------|--------------------------------------------|
| 70                                  | 70                                          | 70                                         |
| 424                                 | 417                                         | 420                                        |
| 546                                 | 546                                         | 545                                        |
| 584                                 | 578                                         | 572                                        |



|      |      |      |
|------|------|------|
| 663  | 659  | 661  |
| 858  | 845  | 849  |
| 999  | 991  | 998  |
| 1070 | 1070 | 1069 |
| 1201 | 1188 | 1196 |
| 1335 | 1330 | 1332 |
| 1408 | 1408 | 1408 |
| 1472 | 1472 | 1471 |
| 1478 | 1478 | 1478 |
| 1812 | 1811 | 1780 |
| 3052 | 3052 | 3052 |
| 3109 | 3109 | 3109 |
| 3159 | 3159 | 3159 |
| 3738 | 3726 | 3738 |

Table S32. Energy and optimized coordinates (Å) for acetate anion,  $\text{CH}_3\text{CO}_2^-$ .

| $E = -228.621929709 \text{ A.U.}$ |           |           |           |
|-----------------------------------|-----------|-----------|-----------|
| Atom                              | $x$       | $y$       | $z$       |
| C                                 | 0.010174  | 0.209370  | 0.000000  |
| O                                 | 0.000616  | 0.751942  | 1.131436  |
| O                                 | 0.000616  | 0.751942  | -1.131436 |
| C                                 | 0.000616  | -1.350532 | 0.000000  |
| H                                 | 0.482359  | -1.746039 | 0.896053  |
| H                                 | -1.039308 | -1.692021 | 0.000000  |
| H                                 | 0.482359  | -1.746039 | -0.896053 |

Table S33. Vibrational frequencies ( $\text{cm}^{-1}$ ) for O isotopologues of acetate anion,  $\text{CH}_3\text{CO}_2^-$ .

| $^{16}\text{O}_2$ | $\text{C}^{18}\text{O}$ |
|-------------------|-------------------------|
| 17                | 17                      |
| 436               | 430                     |
| 599               | 594                     |
| 630               | 624                     |
| 863               | 851                     |
| 998               | 995                     |
| 1033              | 1032                    |
| 1321              | 1316                    |
| 1347              | 1333                    |
| 1462              | 1462                    |
| 1474              | 1473                    |
| 1638              | 1627                    |
| 2998              | 2998                    |
| 3054              | 3054                    |
| 3075              | 3075                    |

**Carbonic Acid, Bicarbonate, Carbonate, and Carbon Dioxide.** The energies and optimized geometries for carbonic acid, bicarbonate anion, carbonate dianion, and carbon dioxide and the vibrational frequencies for their mono- $^{18}\text{O}$  isotopologues are included in Tables S34-S49.

Table S34. Energy and optimized coordinates ( $\text{\AA}$ ) for carbonic acid,  $\text{H}_2\text{CO}_3$ .

| $E = -265.121949794 \text{ A.U.}$ |     |     |     |
|-----------------------------------|-----|-----|-----|
| Atom                              | $x$ | $y$ | $z$ |

|   |          |           |           |
|---|----------|-----------|-----------|
| C | 0.000000 | 0.000000  | 0.101961  |
| O | 0.000000 | 0.000000  | 1.305151  |
| O | 0.000000 | 1.088369  | -0.679396 |
| O | 0.000000 | -1.088369 | -0.679396 |
| H | 0.000000 | 1.854613  | -0.091320 |
| H | 0.000000 | -1.854613 | -0.091320 |

Table S35. Vibrational frequencies ( $\text{cm}^{-1}$ ) for O isotopologues of carbonic acid,  $\text{H}_2\text{CO}_3$ .

| $^{16}\text{O}_2$ | C- $^{18}\text{OH}$ | C= $^{18}\text{O}$ |
|-------------------|---------------------|--------------------|
| 526               | 524                 | 526                |
| 547               | 538                 | 542                |
| 596               | 594                 | 587                |
| 601               | 596                 | 596                |
| 800               | 797                 | 795                |
| 975               | 956                 | 965                |
| 1150              | 1139                | 1150               |
| 1289              | 1284                | 1280               |
| 1453              | 1449                | 1452               |
| 1818              | 1817                | 1789               |
| 3787              | 3776                | 3787               |
| 3790              | 3788                | 3790               |

Table S36. Energy and optimized coordinates ( $\text{\AA}$ ) for bicarbonate anion,  $\text{HCO}_3^-$ .

$$E = -264.573364416 \text{ A.U.}$$

| Atom | <i>x</i>  | <i>y</i>  | <i>z</i> |
|------|-----------|-----------|----------|
| C    | 0.000000  | 0.172464  | 0.000000 |
| O    | -1.001262 | 0.893888  | 0.000000 |
| O    | 1.223692  | 0.427397  | 0.000000 |
| O    | -0.295390 | -1.245700 | 0.000000 |
| H    | 0.583674  | -1.639471 | 0.000000 |

Table S37. Vibrational frequencies ( $\text{cm}^{-1}$ ) for O isotopologues of bicarbonate anion,  $\text{HCO}_3^-$ , where *cis* and *trans* indicate the relationship between the  $\text{C}^{18}\text{O}$  oxygen and the OH proton, as in Figure S2.

| $^{16}\text{O}_2$ | $\text{C}-^{18}\text{OH}$ | $\text{C}^{18}\text{O}$ ( <i>cis</i> ) | $\text{C}^{18}\text{O}$ ( <i>trans</i> ) |
|-------------------|---------------------------|----------------------------------------|------------------------------------------|
| 536               | 535                       | 536                                    | 536                                      |
| 546               | 537                       | 537                                    | 538                                      |
| 620               | 601                       | 613                                    | 612                                      |
| 820               | 818                       | 816                                    | 816                                      |
| 841               | 834                       | 832                                    | 831                                      |
| 1194              | 1185                      | 1187                                   | 1191                                     |
| 1290              | 1290                      | 1268                                   | 1269                                     |
| 1750              | 1749                      | 1742                                   | 1736                                     |
| 3794              | 3782                      | 3794                                   | 3794                                     |

Table S38. Energy and optimized coordinates ( $\text{\AA}$ ) for the bicarbonate anion,  $\text{HCO}_3^-$ , using the polarized continuum solvation method of chloroform.

| $E = -264.661682633 \text{ A.U.}$ |          |          |          |
|-----------------------------------|----------|----------|----------|
| Atom                              | <i>x</i> | <i>y</i> | <i>z</i> |
| C                                 | 0.000000 | 0.149537 | 0.000000 |

|   |           |           |          |
|---|-----------|-----------|----------|
| O | -1.012810 | 0.869647  | 0.000000 |
| O | 1.212064  | 0.462383  | 0.000000 |
| O | -0.273199 | -1.234305 | 0.000000 |
| H | 0.591557  | -1.679023 | 0.000000 |

Table S39. Vibrational frequencies ( $\text{cm}^{-1}$ ) for O isotopologues of the bicarbonate anion,  $\text{HCO}_3^-$ , using the PCM for solvation by chloroform, where *cis* and *trans* indicate the relationship between the  $\text{C}^{18}\text{O}$  oxygen and the OH proton, as in Figure S2.

| $^{16}\text{O}_2$ | $\text{C}-^{18}\text{OH}$ | $\text{C}^{18}\text{O}$ ( <i>cis</i> ) | $\text{C}^{18}\text{O}$ ( <i>trans</i> ) |
|-------------------|---------------------------|----------------------------------------|------------------------------------------|
| 509               | 506                       | 509                                    | 508                                      |
| 568               | 559                       | 559                                    | 560                                      |
| 648               | 632                       | 638                                    | 637                                      |
| 823               | 821                       | 819                                    | 819                                      |
| 896               | 881                       | 887                                    | 887                                      |
| 1206              | 1198                      | 1204                                   | 1200                                     |
| 1302              | 1302                      | 1278                                   | 1284                                     |
| 1679              | 1678                      | 1670                                   | 1666                                     |
| 3595              | 3584                      | 3595                                   | 3595                                     |

Table S40. Energy and optimized coordinates ( $\text{\AA}$ ) for the bicarbonate anion,  $\text{HCO}_3^-$ , using the PCM for solvation by water.

| $E = -264.686036386 \text{ A.U.}$ |           |          |          |
|-----------------------------------|-----------|----------|----------|
| Atom                              | $x$       | $y$      | $z$      |
| C                                 | 0.000000  | 0.139373 | 0.000000 |
| O                                 | -1.021682 | 0.855853 | 0.000000 |
| O                                 | 1.204595  | 0.483241 | 0.000000 |

|   |           |           |          |
|---|-----------|-----------|----------|
| O | -0.258619 | -1.231964 | 0.000000 |
| H | 0.605651  | -1.693280 | 0.000000 |

Table S41. Vibrational frequencies ( $\text{cm}^{-1}$ ) for O isotopologues of the bicarbonate anion,  $\text{HCO}_3^-$ , using the PCM for solvation by water, where *cis* and *trans* indicate the relationship between the  $\text{C}^{18}\text{O}$  oxygen and the OH proton.

| $^{16}\text{O}_2$ | C- $^{18}\text{OH}$ | $\text{C}^{18}\text{O}$ ( <i>cis</i> ) | $\text{C}^{18}\text{O}$ ( <i>trans</i> ) |
|-------------------|---------------------|----------------------------------------|------------------------------------------|
| 496               | 494                 | 496                                    | 495                                      |
| 575               | 566                 | 565                                    | 568                                      |
| 654               | 640                 | 645                                    | 643                                      |
| 823               | 821                 | 819                                    | 819                                      |
| 922               | 904                 | 913                                    | 913                                      |
| 1200              | 1192                | 1198                                   | 1192                                     |
| 1306              | 1306                | 1283                                   | 1291                                     |
| 1639              | 1638                | 1630                                   | 1627                                     |
| 3435              | 3424                | 3435                                   | 3435                                     |

Table S42. Energy and optimized coordinates ( $\text{\AA}$ ) for the carbonate dianion,  $\text{CO}_3^{2-}$ .

| $E = -263.792764512 \text{ A.U.}$ |           |           |          |
|-----------------------------------|-----------|-----------|----------|
| Atom                              | $x$       | $y$       | $z$      |
| C                                 | 0.000000  | 0.000000  | 0.000000 |
| O                                 | 0.000000  | 1.306138  | 0.000000 |
| O                                 | 1.131149  | -0.653069 | 0.000000 |
| O                                 | -1.131149 | -0.653069 | 0.000000 |

Table S43. Vibrational frequencies ( $\text{cm}^{-1}$ ) for O isotopologues of the carbonate dianion,  $\text{CO}_3^{2-}$ .

| $^{16}\text{O}_3$ | $\text{C}^{18}\text{O}$ |
|-------------------|-------------------------|
| 638               | 624                     |
| 638               | 630                     |
| 858               | 855                     |
| 1011              | 991                     |
| 1296              | 1284                    |
| 1296              | 1295                    |

Table S44. Energy and optimized coordinates ( $\text{\AA}$ ) for carbon dioxide,  $\text{CO}_2$ .

| $E = -188.663386958 \text{ A.U.}$ |          |          |           |
|-----------------------------------|----------|----------|-----------|
| Atom                              | $x$      | $y$      | $z$       |
| C                                 | 0.000000 | 0.000000 | 0.000000  |
| O                                 | 0.000000 | 0.000000 | 1.160469  |
| O                                 | 0.000000 | 0.000000 | -1.160469 |

Table S45. Vibrational frequencies ( $\text{cm}^{-1}$ ) for O isotopologues of carbon dioxide,  $\text{CO}_2$ .

| $^{16}\text{O}_2$ | $\text{C}^{18}\text{O}$ |
|-------------------|-------------------------|
| 674               | 669                     |
| 674               | 669                     |
| 1369              | 1330                    |
| 2400              | 2383                    |

Table S46. Energy and optimized coordinates ( $\text{\AA}$ ) for carbon dioxide,  $\text{CO}_2$ , with the PCM for solvation by chloroform.

$$E = -188.666091910 \text{ A.U.}$$

| Atom | $x$      | $y$      | $z$       |
|------|----------|----------|-----------|
| C    | 0.000000 | 0.000000 | 0.000000  |
| O    | 0.000000 | 0.000000 | 1.160233  |
| O    | 0.000000 | 0.000000 | -1.160233 |

Table S47. Vibrational frequencies ( $\text{cm}^{-1}$ ) for O isotopologues of carbon dioxide,  $\text{CO}_2$ , with the PCM for solvation by chloroform.

| $^{16}\text{O}_2$ | C= $^{18}\text{O}$ |
|-------------------|--------------------|
| 667               | 662                |
| 667               | 662                |
| 1370              | 1331               |
| 2364              | 2347               |

Table S48. Energy and optimized coordinates ( $\text{\AA}$ ) for carbon dioxide,  $\text{CO}_2$ , with the PCM for solvation by water.

$$E = -188.667189144 \text{ A.U.}$$

| Atom | $x$      | $y$      | $z$       |
|------|----------|----------|-----------|
| C    | 0.000000 | 0.000000 | 0.000000  |
| O    | 0.000000 | 0.000000 | 1.160146  |
| O    | 0.000000 | 0.000000 | -1.160146 |

Table S49. Vibrational frequencies ( $\text{cm}^{-1}$ ) for O isotopologues of carbon dioxide,  $\text{CO}_2$ , with the PCM for solvation by water.

| $^{16}\text{O}_2$ | C= $^{18}\text{O}$ |
|-------------------|--------------------|
| 665               | 660                |



|      |      |
|------|------|
| 665  | 660  |
| 1371 | 1331 |
| 2349 | 2332 |

**Nitrogen-Centered Acids and their Conjugate Bases.** The energies and optimized geometries for nitrous acid, the nitrosonium cation, nitrite anion, nitric acid, the nitronium cation, and nitrate anion and the vibrational frequencies for their mono- $^{18}\text{O}$  isotopologues are included in Tables S50-S71.

Table S50. Energy and optimized coordinates (Å) for nitrous acid, HONO.

| $E = -205.790627265 \text{ A.U.}$ |           |           |          |
|-----------------------------------|-----------|-----------|----------|
| Atom                              | $x$       | $y$       | $z$      |
| N                                 | 0.000000  | 0.546973  | 0.000000 |
| O                                 | 1.084475  | 0.090252  | 0.000000 |
| O                                 | -1.013492 | -0.408799 | 0.000000 |
| H                                 | -0.567872 | -1.280438 | 0.000000 |

Table S51. Vibrational frequencies ( $\text{cm}^{-1}$ ) for O isotopologues of nitrous acid, HONO.

| $^{16}\text{O}_2$ | N- $^{18}\text{OH}$ | N= $^{18}\text{O}$ |
|-------------------|---------------------|--------------------|
| 623               | 606                 | 613                |
| 683               | 679                 | 682                |
| 864               | 854                 | 859                |
| 1330              | 1320                | 1320               |
| 1708              | 1707                | 1669               |
| 3578              | 3567                | 3578               |

Table S52. Energy and optimized coordinates (Å) for nitrous acid, HONO, using the PCM for

solvation by chloroform.

$$E = -205.798586215 \text{ A.U.}$$

| Atom | <i>x</i>  | <i>y</i>  | <i>z</i> |
|------|-----------|-----------|----------|
| N    | 0.000000  | 0.540345  | 0.000000 |
| O    | 1.087553  | 0.078907  | 0.000000 |
| O    | -1.012968 | -0.389973 | 0.000000 |
| H    | -0.596676 | -1.293891 | 0.000000 |

Table S53. Vibrational frequencies ( $\text{cm}^{-1}$ ) for O isotopologues of nitrous acid, HONO, using the PCM for solvation by chloroform.

| $^{16}\text{O}_2$ | N- $^{18}\text{OH}$ | N= $^{18}\text{O}$ |
|-------------------|---------------------|--------------------|
| 648               | 631                 | 637                |
| 668               | 664                 | 667                |
| 868               | 857                 | 863                |
| 1334              | 1324                | 1325               |
| 1673              | 1672                | 1635               |
| 3254              | 3244                | 3254               |

Table S54. Energy and optimized coordinates ( $\text{\AA}$ ) for the nitrosonium cation,  $\text{NO}^+$

$$E = -129.587323609 \text{ A.U.}$$

| Atom | <i>x</i> | <i>y</i> | <i>z</i>  |
|------|----------|----------|-----------|
| N    | 0.000000 | 0.000000 | -0.563691 |
| O    | 0.000000 | 0.000000 | 0.493230  |

Table S55. Vibrational frequencies ( $\text{cm}^{-1}$ ) for O isotopologues of the nitrosonium cation,  $\text{NO}^+$ .

| $^{16}\text{O}$ | $\text{N}^{18}\text{O}$ |
|-----------------|-------------------------|
| 2477            | 2412                    |

Table S56. Energy and optimized coordinates (Å) for the nitrosonium cation,  $\text{NO}^+$ , using the PCM for solvation by chloroform.

| $E = -129.693786365 \text{ A.U.}$ |          |          |           |
|-----------------------------------|----------|----------|-----------|
| Atom                              | $x$      | $y$      | $z$       |
| N                                 | 0.000000 | 0.000000 | -0.562637 |
| O                                 | 0.000000 | 0.000000 | 0.492307  |

Table S57. Vibrational frequencies ( $\text{cm}^{-1}$ ) for O isotopologues of the nitrosonium cation,  $\text{NO}^+$ , using the PCM for solvation by chloroform.

| $^{16}\text{O}$ | $\text{N}^{18}\text{O}$ |
|-----------------|-------------------------|
| 2484            | 2418                    |

Table S58. Energy and optimized coordinates (Å) for the nitrite anion,  $\text{NO}_2^-$ .

| $E = -205.242086246 \text{ A.U.}$ |          |           |           |
|-----------------------------------|----------|-----------|-----------|
| Atom                              | $x$      | $y$       | $z$       |
| N                                 | 0.000000 | 0.000000  | 0.457240  |
| O                                 | 0.000000 | 1.069661  | -0.200043 |
| O                                 | 0.000000 | -1.069661 | -0.200043 |

Table S59. Vibrational frequencies ( $\text{cm}^{-1}$ ) for O isotopologues of nitrite anion,  $\text{NO}_2^-$ .

| $^{16}\text{O}_2$ | $\text{N}^{18}\text{O}$ |
|-------------------|-------------------------|
| 796               | 778                     |

1283 1264

1325 1312

Table S60. . Energy and optimized coordinates (Å) for the nitrite anion,  $\text{NO}_2^-$ , using the PCM for solvation by chloroform.

| $E = -205.328271379 \text{ A.U.}$ |          |           |           |
|-----------------------------------|----------|-----------|-----------|
| Atom                              | $x$      | $y$       | $z$       |
| N                                 | 0.000000 | 0.000000  | 0.459542  |
| O                                 | 0.000000 | 1.066314  | -0.201050 |
| O                                 | 0.000000 | -1.066314 | -0.201050 |

Table S61. Vibrational frequencies ( $\text{cm}^{-1}$ ) for O isotopologues of nitrite anion,  $\text{NO}_2^-$ , using the PCM for solvation by chloroform.

| $^{16}\text{O}_2$ | $\text{N}^{18}\text{O}$ |
|-------------------|-------------------------|
| 802               | 784                     |
| 1252              | 1236                    |
| 1341              | 1325                    |

Table S62. Energy and optimized coordinates (Å) for nitric acid,  $\text{HNO}_3$ .

| $E = -281.007114831 \text{ A.U.}$ |           |           |          |
|-----------------------------------|-----------|-----------|----------|
| Atom                              | $x$       | $y$       | $z$      |
| N                                 | 0.000000  | 0.155887  | 0.000000 |
| O                                 | 1.167566  | 0.464330  | 0.000000 |
| O                                 | -0.979722 | 0.835576  | 0.000000 |
| O                                 | -0.265660 | -1.232965 | 0.000000 |

|   |          |           |          |
|---|----------|-----------|----------|
| H | 0.622530 | -1.626743 | 0.000000 |
|---|----------|-----------|----------|

Table S63. Vibrational frequencies ( $\text{cm}^{-1}$ ) for O isotopologues of nitric acid,  $\text{HNO}_3$ , where *cis* and *trans* represent the relationship between  $\text{N}^{18}\text{O}$  and the OH proton

| $^{16}\text{O}_3$ | $\text{N}-^{18}\text{OH}$ | $\text{N}^{18}\text{O} (cis)$ | $\text{N}^{18}\text{O} (trans)$ |
|-------------------|---------------------------|-------------------------------|---------------------------------|
| 485               | 483                       | 485                           | 485                             |
| 585               | 576                       | 575                           | 578                             |
| 647               | 625                       | 641                           | 639                             |
| 783               | 781                       | 779                           | 779                             |
| 896               | 890                       | 884                           | 884                             |
| 1316              | 1311                      | 1291                          | 1312                            |
| 1342              | 1340                      | 1337                          | 1320                            |
| 1744              | 1743                      | 1736                          | 1730                            |
| 3711              | 3699                      | 3711                          | 3711                            |

Table S64. Energy and optimized coordinates ( $\text{\AA}$ ) for nitric acid,  $\text{HNO}_3$ , using the PCM for solvation by chloroform.

| $E = -281.017685088 \text{ A.U.}$ |           |           |          |
|-----------------------------------|-----------|-----------|----------|
| Atom                              | $x$       | $y$       | $z$      |
| N                                 | 0.000000  | 0.142125  | 0.000000 |
| O                                 | 1.158279  | 0.488884  | 0.000000 |
| O                                 | -0.991522 | 0.817676  | 0.000000 |
| O                                 | -0.247535 | -1.224820 | 0.000000 |
| H                                 | 0.646225  | -1.648793 | 0.000000 |

Table S65. Vibrational frequencies ( $\text{cm}^{-1}$ ) for O isotopologues of nitric acid,  $\text{HNO}_3$ , using the PCM for solvation by chloroform, where *cis* and *trans* represent the relationship between  $\text{N}^{18}\text{O}$  and the OH proton.

| $^{16}\text{O}_3$ | $\text{N}-^{18}\text{OH}$ | $\text{N}^{18}\text{O}$ ( <i>cis</i> ) | $\text{N}^{18}\text{O}$ ( <i>trans</i> ) |
|-------------------|---------------------------|----------------------------------------|------------------------------------------|
| 454               | 452                       | 454                                    | 453                                      |
| 604               | 594                       | 593                                    | 596                                      |
| 670               | 649                       | 663                                    | 660                                      |
| 788               | 786                       | 784                                    | 783                                      |
| 905               | 896                       | 894                                    | 894                                      |
| 1318              | 1316                      | 1294                                   | 1291                                     |
| 1334              | 1328                      | 1328                                   | 1334                                     |
| 1680              | 1679                      | 1673                                   | 1668                                     |
| 3349              | 3338                      | 3349                                   | 3349                                     |

Table S66. Energy and optimized coordinates ( $\text{\AA}$ ) for the nitronium cation,  $\text{NO}_2^+$ .

| $E = -129.587323609 \text{ A.U.}$ |          |          |           |
|-----------------------------------|----------|----------|-----------|
| Atom                              | $x$      | $y$      | $z$       |
| N                                 | 0.000000 | 0.000000 | 0.000000  |
| O                                 | 0.000000 | 0.000000 | 1.115776  |
| O                                 | 0.000000 | 0.000000 | -1.115776 |

Table S67. Vibrational frequencies ( $\text{cm}^{-1}$ ) for O isotopologues of the nitronium cation,  $\text{NO}_2^+$ .

| $^{16}\text{O}_2$ | $\text{N}=^{18}\text{O}$ |
|-------------------|--------------------------|
| 653               | 648                      |
| 653               | 648                      |
| 1447              | 1405                     |

2438      2418

Table S68. Energy and optimized coordinates (Å) for the nitrate anion,  $\text{NO}_3^-$ .

| <u><math>E = -280.481786765 \text{ A.U.}</math></u> |                       |                       |                       |
|-----------------------------------------------------|-----------------------|-----------------------|-----------------------|
| <u>Atom</u>                                         | <u><math>x</math></u> | <u><math>y</math></u> | <u><math>z</math></u> |
| N                                                   | 0.000000              | 0.000000              | 0.000000              |
| O                                                   | 0.000000              | 1.258044              | 0.000000              |
| O                                                   | 1.089498              | -0.629022             | 0.000000              |
| O                                                   | -1.089498             | -0.629022             | 0.000000              |

Table S69. Vibrational frequencies ( $\text{cm}^{-1}$ ) for O isotopologues of nitrate anion,  $\text{NO}_3^-$ .

| <u><math>^{16}\text{O}_3</math></u> | <u><math>\text{N}^{18}\text{O}</math></u> |
|-------------------------------------|-------------------------------------------|
| 707                                 | 691                                       |
| 707                                 | 697                                       |
| 843                                 | 840                                       |
| 1062                                | 1041                                      |
| 1364                                | 1352                                      |
| 1364                                | 1364                                      |

Table S70. Energy and optimized coordinates (Å) for the nitrate anion,  $\text{NO}_3^-$ , using the PCM for solvation by chloroform.

| <u><math>E = -280.563583342 \text{ A.U.}</math></u> |                       |                       |                       |
|-----------------------------------------------------|-----------------------|-----------------------|-----------------------|
| <u>Atom</u>                                         | <u><math>x</math></u> | <u><math>y</math></u> | <u><math>z</math></u> |
| N                                                   | 0.000000              | 0.000000              | 0.000000              |
| O                                                   | 0.000000              | 1.237600              | 0.000000              |

|   |           |           |          |
|---|-----------|-----------|----------|
| O | 1.071793  | -0.618800 | 0.000000 |
| O | -1.071793 | -0.618800 | 0.000000 |

Table S71. Vibrational frequencies ( $\text{cm}^{-1}$ ) for O isotopologues of nitrate anion,  $\text{NO}_3^-$ , using the PCM for solvation by chloroform.

| $^{16}\text{O}_3$ | $\text{N}^{18}\text{O}$ |
|-------------------|-------------------------|
| 712               | 696                     |
| 712               | 702                     |
| 841               | 838                     |
| 1073              | 1052                    |
| 1341              | 1328                    |
| 1341              | 1341                    |

**Boron-centered Acids and their Conjugate Bases.** The energies and optimized geometries for the various boron species— $\text{BH}_3$ ,  $\text{BH}_3\text{OH}^-$ ,  $\text{H}_2\text{BOH}$ ,  $\text{H}_2\text{BO}^-$ ,  $\text{H}_2\text{B}(\text{OH})_2^-$ ,  $\text{HB}(\text{OH})_2$ ,  $\text{HB}(\text{OH})\text{O}^-$ ,  $\text{HB}(\text{OH})_3^-$ ,  $\text{B}(\text{OH})_3$ ,  $\text{B}(\text{OH})_2\text{O}^-$ , and  $\text{B}(\text{OH})_4^-$ —and the vibrational frequencies for their mono- $^{18}\text{O}$  isotopologues, along with select moments of inertia, are included in Tables S72-S96.

Table S72. Energy and optimized coordinates ( $\text{\AA}$ ) for borane,  $\text{BH}_3$ .

| $E = -26.6243786243 \text{ A.U.}$ |           |           |          |
|-----------------------------------|-----------|-----------|----------|
| Atom                              | $x$       | $y$       | $z$      |
| B                                 | 0.000000  | 0.000000  | 0.000000 |
| H                                 | 0.000000  | 1.188050  | 0.000000 |
| H                                 | 1.028881  | -0.594025 | 0.000000 |
| H                                 | -1.028881 | -0.594025 | 0.000000 |



Table S73. Vibrational frequencies (cm<sup>-1</sup>) for borane, BH<sub>3</sub>.

|             |
|-------------|
| 1161        |
| 1204        |
| 1204        |
| 2565        |
| 2692        |
| <u>2692</u> |

Table S74. Energy and optimized coordinates (Å) for hydroxytrihydroborate anion, H<sub>3</sub>BOH<sup>-</sup>, the hydroxide adduct of borane.

| <u><math>E = -102.572342758</math> A.U.</u> |                       |                       |                       |
|---------------------------------------------|-----------------------|-----------------------|-----------------------|
| <u>Atom</u>                                 | <u><math>x</math></u> | <u><math>y</math></u> | <u><math>z</math></u> |
| B                                           | -0.052466             | 0.741654              | 0.000000              |
| O                                           | -0.052466             | -0.772228             | 0.000000              |
| H                                           | 0.523532              | 1.204725              | 1.007431              |
| H                                           | 0.523532              | 1.204725              | -1.007431             |
| H                                           | -1.224393             | 1.127401              | 0.000000              |
| H                                           | 0.859387              | -1.067294             | 0.000000              |

Table S75. Vibrational frequencies (cm<sup>-1</sup>) for O isotopologues of hydroxytrihydroborate anion, H<sub>3</sub>BOH<sup>-</sup>, the the hydroxide adduct of borane.

| <u><sup>16</sup>O</u> | <u>B-<sup>18</sup>OH</u> |
|-----------------------|--------------------------|
| 222                   | 221                      |
| 829                   | 812                      |
| 842                   | 837                      |
| 944                   | 941                      |

|      |      |
|------|------|
| 1119 | 1113 |
| 1155 | 1155 |
| 1171 | 1171 |
| 1196 | 1195 |
| 2104 | 2104 |
| 2162 | 2162 |
| 2264 | 2264 |
| 3842 | 3830 |

Table S76. Energy and optimized coordinates (Å) for borinic acid, H<sub>2</sub>BOH.

| $E = -101.958955219$ A.U. |           |           |          |
|---------------------------|-----------|-----------|----------|
| Atom                      | $x$       | $y$       | $z$      |
| B                         | 0.052746  | 0.714038  | 0.000000 |
| O                         | 0.052746  | -0.638879 | 0.000000 |
| H                         | -0.976288 | 1.322753  | 0.000000 |
| H                         | 1.115450  | 1.250539  | 0.000000 |
| H                         | -0.824856 | -1.032451 | 0.000000 |

Table S77. Vibrational frequencies (cm<sup>-1</sup>) for O isotopologues of borinic acid, H<sub>2</sub>BOH.

| <sup>16</sup> O | B- <sup>18</sup> OH |
|-----------------|---------------------|
| 777             | 774                 |
| 888             | 887                 |
| 1058            | 1058                |
| 1174            | 1160                |

|      |      |
|------|------|
| 1183 | 1170 |
| 1367 | 1354 |
| 2560 | 2560 |
| 2657 | 2657 |
| 3826 | 3813 |

Table S78. Energy and optimized coordinates (Å) for the borinate anion,  $\text{H}_2\text{BO}^-$ , the product of deprotonation of borinic acid.

| $E = -101.376865776 \text{ A.U.}$ |          |           |           |
|-----------------------------------|----------|-----------|-----------|
| Atom                              | $x$      | $y$       | $z$       |
| B                                 | 0.000000 | 0.000000  | -0.591894 |
| O                                 | 0.000000 | 0.000000  | 0.694457  |
| H                                 | 0.000000 | 1.041479  | -1.298094 |
| H                                 | 0.000000 | -1.041479 | -1.298094 |

Table S79. Vibrational frequencies ( $\text{cm}^{-1}$ ) for O isotopologues of borinate anion,  $\text{H}_2\text{BO}^-$ , the product of deprotonation of borinic acid.

| $^{16}\text{O}$ | B- $^{18}\text{O}$ |
|-----------------|--------------------|
| 960             | 956                |
| 992             | 991                |
| 1196            | 1190               |
| 1522            | 1492               |
| 2019            | 2019               |
| 2152            | 2152               |

Table S80. Energy and optimized coordinates (Å) for dihydroxydihydroborate anion,  $\text{H}_2\text{B}(\text{OH})_2^-$ , the hydroxide adduct of borinic acid.

| $E = -177.883582970 \text{ A.U.}$ |           |           |           |
|-----------------------------------|-----------|-----------|-----------|
| Atom                              | $x$       | $y$       | $z$       |
| B                                 | 0.000000  | 0.000000  | 0.596826  |
| O                                 | 0.000000  | -1.240096 | -0.251895 |
| O                                 | 0.000000  | 1.240096  | -0.251895 |
| H                                 | -1.021172 | -0.074639 | 1.301110  |
| H                                 | 1.021172  | 0.074639  | 1.301110  |
| H                                 | 0.803824  | -1.225341 | -0.778014 |
| H                                 | -0.803824 | 1.225341  | -0.778014 |

Table S81. Vibrational frequencies ( $\text{cm}^{-1}$ ) for O isotopologues of dihydroxydihydroborate anion,  $\text{H}_2\text{B}(\text{OH})_2^-$ , the hydroxide adduct of borinic acid.

| $^{16}\text{O}_2$ | B- $^{18}\text{OH}$ |
|-------------------|---------------------|
| 281               | 280                 |
| 292               | 291                 |
| 479               | 470                 |
| 794               | 793                 |
| 836               | 819                 |
| 847               | 844                 |
| 942               | 941                 |
| 1097              | 1094                |
| 1136              | 1133                |
| 1180              | 1179                |
| 1205              | 1205                |

|      |      |
|------|------|
| 2170 | 2170 |
| 2211 | 2211 |
| 3812 | 3800 |
| 3812 | 3812 |

Table S82. Energy and optimized coordinates (Å) for boronic acid, HB(OH)<sub>2</sub>.

| $E = -177.288987050$ A.U. |           |           |          |
|---------------------------|-----------|-----------|----------|
| Atom                      | $x$       | $y$       | $z$      |
| B                         | 0.000000  | 0.484651  | 0.000000 |
| O                         | -1.223983 | -0.104059 | 0.000000 |
| O                         | 1.121480  | -0.299412 | 0.000000 |
| H                         | 0.056951  | 1.674926  | 0.000000 |
| H                         | -1.179995 | -1.066998 | 0.000000 |
| H                         | 1.943067  | 0.196576  | 0.000000 |

Table S83. Vibrational frequencies (cm<sup>-1</sup>) for O isotopologues of boronic acid, HB(OH)<sub>2</sub>, where *cis* and *trans* represent the relationship between the OH and BH protons.

| <sup>16</sup> O <sub>2</sub> | B- <sup>18</sup> OH ( <i>cis</i> ) | B- <sup>18</sup> OH ( <i>trans</i> ) |
|------------------------------|------------------------------------|--------------------------------------|
| 475                          | 466                                | 468                                  |
| 531                          | 529                                | 531                                  |
| 629                          | 629                                | 624                                  |
| 927                          | 925                                | 926                                  |
| 966                          | 964                                | 963                                  |
| 1005                         | 997                                | 988                                  |
| 1113                         | 1103                               | 1109                                 |

|      |      |      |
|------|------|------|
| 1232 | 1220 | 1226 |
| 1430 | 1425 | 1420 |
| 2631 | 2631 | 2631 |
| 3804 | 3804 | 3792 |
| 3866 | 3853 | 3866 |

Table S84. Moments of inertia (atomic units) of boronic acid isotopomers.

| Acid                                     | $I_x$  | $I_y$   | $I_z$   | $I_x I_y I_z$ |
|------------------------------------------|--------|---------|---------|---------------|
| Boronic                                  | 29.080 | 176.190 | 205.270 | 1051729       |
| Boronic- <i>cis</i> - $^{18}\text{OH}$   | 29.479 | 185.279 | 214.758 | 1172981       |
| Boronic- <i>trans</i> - $^{18}\text{OH}$ | 29.213 | 186.103 | 215.316 | 1170597       |

Table S85. Energy and optimized coordinates (Å) for boronate,  $\text{HB}(\text{OH})\text{O}^-$ , the product of deprotonation of boronic acid.

| $E = -176.707148460 \text{ A.U.}$ |           |           |          |  |
|-----------------------------------|-----------|-----------|----------|--|
| Atom                              | $x$       | $y$       | $z$      |  |
| B                                 | 0.000000  | 0.470565  | 0.000000 |  |
| O                                 | 1.246422  | 0.136294  | 0.000000 |  |
| O                                 | -1.104569 | -0.466168 | 0.000000 |  |
| H                                 | -0.453396 | 1.620020  | 0.000000 |  |
| H                                 | -0.681430 | -1.333852 | 0.000000 |  |

Table S86. Vibrational frequencies ( $\text{cm}^{-1}$ ) for O isotopologues of boronate,  $\text{HB}(\text{OH})\text{O}^-$ , the product of deprotonation of boronic acid.

| $^{16}\text{O}_2$ | B- $^{18}\text{OH}$ | B- $^{18}\text{O}$ |
|-------------------|---------------------|--------------------|
|-------------------|---------------------|--------------------|

|      |      |      |
|------|------|------|
| 484  | 478  | 474  |
| 595  | 591  | 594  |
| 880  | 879  | 878  |
| 909  | 885  | 906  |
| 1059 | 1057 | 1057 |
| 1109 | 1105 | 1103 |
| 1518 | 1517 | 1489 |
| 2278 | 2278 | 2278 |
| 3758 | 3747 | 3758 |

Table S87. Moments of inertia (atomic units) of boronate anion isotopomers.

| Acid                                      | $I_x$  | $I_y$   | $I_z$   | $I_x I_y I_z$ |
|-------------------------------------------|--------|---------|---------|---------------|
| Boronate                                  | 26.288 | 172.475 | 198.763 | 901185        |
| Boronate- $^{18}\text{O}^-$               | 26.597 | 182.508 | 209.105 | 1015016       |
| Boronate- <i>trans</i> - $^{18}\text{OH}$ | 26.398 | 182.625 | 209.022 | 1007671       |

Table S88. Energy and optimized coordinates (Å) for trihydroxyhydroborate anion,  $\text{HB}(\text{OH})_3^-$ , the hydroxide adduct of boronic acid.

| $E = -253.200687350 \text{ A.U.}$ |           |           |           |
|-----------------------------------|-----------|-----------|-----------|
| Atom                              | $x$       | $y$       | $z$       |
| B                                 | 0.000000  | 0.000000  | 0.432348  |
| O                                 | 0.000000  | 1.406696  | -0.076747 |
| O                                 | 1.218234  | -0.703348 | -0.076747 |
| O                                 | -1.218234 | -0.703348 | -0.076747 |
| H                                 | -1.646370 | -0.075139 | -0.663753 |

|   |          |           |           |
|---|----------|-----------|-----------|
| H | 0.000000 | 0.000000  | 1.671445  |
| H | 0.888258 | -1.388229 | -0.663753 |
| H | 0.758112 | 1.463368  | -0.663753 |

Table S89. Vibrational frequencies ( $\text{cm}^{-1}$ ) for O isotopologues of trihydroxyhydroborate anion,  $\text{HB}(\text{OH})_3^-$ , the hydroxide adduct of boronic acid.

| $^{16}\text{O}_3$ | B- $^{18}\text{OH}$ |
|-------------------|---------------------|
| 127               | 127                 |
| 127               | 127                 |
| 386               | 384                 |
| 391               | 386                 |
| 391               | 387                 |
| 538               | 532                 |
| 814               | 801                 |
| 832               | 826                 |
| 832               | 831                 |
| 1009              | 1007                |
| 1009              | 1008                |
| 1086              | 1085                |
| 1166              | 1163                |
| 1166              | 1165                |
| 2227              | 2227                |
| 3830              | 3820                |
| 3835              | 3832                |
| 3835              | 3835                |



Table S90. Energy and optimized coordinates (Å) for boric acid, B(OH)<sub>3</sub>.

| $E = -252.611166552$ A.U. |           |           |          |
|---------------------------|-----------|-----------|----------|
| Atom                      | $x$       | $y$       | $z$      |
| B                         | 0.000000  | 0.000000  | 0.000000 |
| O                         | 0.000000  | 1.370689  | 0.000000 |
| O                         | -1.187052 | -0.685345 | 0.000000 |
| O                         | 1.187052  | -0.685345 | 0.000000 |
| H                         | -0.884567 | 1.745916  | 0.000000 |
| H                         | -1.069724 | -1.639015 | 0.000000 |
| H                         | 1.954291  | -0.106900 | 0.000000 |

Table S91. Vibrational frequencies (cm<sup>-1</sup>) for O isotopologues of boric acid, B(OH)<sub>3</sub>.

| <sup>16</sup> O <sub>3</sub> | B- <sup>18</sup> OH |
|------------------------------|---------------------|
| 428                          | 420                 |
| 428                          | 423                 |
| 447                          | 447                 |
| 533                          | 531                 |
| 533                          | 533                 |
| 670                          | 668                 |
| 876                          | 860                 |
| 1015                         | 1005                |
| 1015                         | 1012                |
| 1019                         | 1018                |
| 1442                         | 1432                |

|      |      |
|------|------|
| 1442 | 1441 |
| 3852 | 3840 |
| 3852 | 3852 |
| 3853 | 3853 |

Table S92. Energy and optimized coordinates (Å) for the lowest-energy conformer of dihydrogen borate, *cis,cis* B(OH)<sub>2</sub>O<sup>-</sup> (where *cis* represents the relationship between the OH and the O<sup>-</sup>), from deprotonation of boric acid.

| $E = -252.027069013$ A.U. |          |           |           |
|---------------------------|----------|-----------|-----------|
| Atom                      | <i>x</i> | <i>y</i>  | <i>z</i>  |
| B                         | 0.000000 | 0.000000  | 0.108766  |
| O                         | 0.000000 | 1.172804  | -0.725424 |
| O                         | 0.000000 | -1.172804 | -0.725424 |
| O                         | 0.000000 | 0.000000  | 1.408180  |
| H                         | 0.000000 | -1.902430 | -0.101239 |
| H                         | 0.000000 | 1.902430  | -0.101239 |

Table S93. Vibrational frequencies (cm<sup>-1</sup>) for O isotopologues of the lowest-energy conformer of dihydrogen borate, *cis,cis* B(OH)<sub>2</sub>O<sup>-</sup>, from deprotonation of boric acid.

| <sup>16</sup> O <sub>3</sub> | B- <sup>18</sup> OH | B- <sup>18</sup> O |
|------------------------------|---------------------|--------------------|
| 418                          | 411                 | 414                |
| 459                          | 455                 | 449                |
| 496                          | 494                 | 496                |
| 520                          | 520                 | 520                |
| 704                          | 701                 | 700                |
| 794                          | 778                 | 786                |

|      |      |      |
|------|------|------|
| 960  | 951  | 960  |
| 1072 | 1068 | 1064 |
| 1200 | 1198 | 1199 |
| 1523 | 1522 | 1500 |
| 3847 | 3835 | 3847 |
| 3849 | 3848 | 3849 |

Table S94. Energy and optimized coordinates (Å) of *cis/trans*-dihydrogen borate,  $\text{B}(\text{OH})_2\text{O}^-$ , where *cis* and *trans* represent the relationships between the OH and the  $\text{O}^-$ .

| $E = -252.024134192 \text{ A.U.}$ |           |           |          |
|-----------------------------------|-----------|-----------|----------|
| Atom                              | $x$       | $y$       | $z$      |
| B                                 | 0.000000  | 0.173458  | 0.000000 |
| O                                 | 1.344696  | -0.340299 | 0.000000 |
| O                                 | -0.931108 | -0.952165 | 0.000000 |
| O                                 | -0.351102 | 1.414294  | 0.000000 |
| H                                 | 1.299703  | -1.299669 | 0.000000 |
| H                                 | -1.799582 | -0.542260 | 0.000000 |

Table S95. Energy and optimized coordinates (Å) for borate,  $\text{B}(\text{OH})_4^-$ , the hydroxide adduct of boric acid.

| $E = -328.518395869 \text{ A.U.}$ |          |          |           |
|-----------------------------------|----------|----------|-----------|
| Atom                              | $x$      | $y$      | $z$       |
| B                                 | 0.000000 | 0.000000 | 0.000000  |
| O                                 | 0.000000 | 1.252369 | 0.801039  |
| O                                 | 1.252369 | 0.000000 | -0.801039 |

|   |           |           |           |
|---|-----------|-----------|-----------|
| O | 0.000000  | -1.252369 | 0.801039  |
| O | -1.252369 | 0.000000  | -0.801039 |
| H | -0.912912 | -1.436339 | 1.031131  |
| H | 0.912912  | 1.436339  | 1.031131  |
| H | 1.436339  | -0.912912 | -1.031131 |
| H | -1.436339 | 0.912912  | -1.031131 |

Table S96. Vibrational frequencies ( $\text{cm}^{-1}$ ) for O isotopologues of borate,  $\text{B}(\text{OH})_4^-$ , the hydroxide adduct of boric acid.

| $^{16}\text{O}_4$ | $\text{B}-^{18}\text{OH}$ |
|-------------------|---------------------------|
| 171               | 171                       |
| 221               | 220                       |
| 289               | 288                       |
| 289               | 289                       |
| 350               | 345                       |
| 404               | 401                       |
| 474               | 468                       |
| 474               | 471                       |
| 507               | 500                       |
| 726               | 716                       |
| 844               | 837                       |
| 844               | 844                       |
| 962               | 959                       |
| 1002              | 1000                      |
| 1047              | 1045                      |

|      |      |
|------|------|
| 1187 | 1184 |
| 1187 | 1186 |
| 3850 | 3840 |
| 3853 | 3851 |
| 3853 | 3853 |
| 3856 | 3855 |

**Phosphorus-centered Acids and their Conjugate Bases.** The energies and optimized geometries for phosphinic acid, phosphinate anion, phosphonic acid, hydrogen phosphonate anion, phosphonate dianion, phosphoric acid, dihydrogen phosphate anion, hydrogen phosphate dianion, phosphate trianion, phosphenic acid, and phosphenate anion, and the vibrational frequencies for their mono- $^{18}\text{O}$  isotopologues are included in Tables S97-116.

Table S97. Energy and optimized coordinates (Å) for phosphinic acid,  $\text{H}_2\text{POOH}$ .

| $E = -493.743114960 \text{ A.U.}$ |           |           |           |
|-----------------------------------|-----------|-----------|-----------|
| Atom                              | $x$       | $y$       | $z$       |
| P                                 | -0.122760 | 0.369069  | 0.016441  |
| O                                 | -1.282687 | -0.548872 | -0.029767 |
| O                                 | 1.347558  | -0.303584 | -0.061600 |
| H                                 | -0.063736 | 1.170312  | 1.178028  |
| H                                 | 0.011205  | 1.291324  | -1.039621 |
| H                                 | 1.374959  | -1.178029 | 0.345918  |

Table S98. Vibrational frequencies ( $\text{cm}^{-1}$ ) for O isotopologues of phosphinic acid,  $\text{H}_2\text{POOH}$ .

| $^{16}\text{O}_2$ | P- $^{18}\text{OH}$ | P= $^{18}\text{O}$ |
|-------------------|---------------------|--------------------|
| 177               | 176                 | 176                |
| 395               | 388                 | 387                |

|      |      |      |
|------|------|------|
| 780  | 779  | 777  |
| 856  | 824  | 854  |
| 885  | 884  | 884  |
| 996  | 993  | 995  |
| 1090 | 1087 | 1086 |
| 1163 | 1163 | 1155 |
| 1272 | 1272 | 1239 |
| 2413 | 2413 | 2413 |
| 2445 | 2445 | 2445 |
| 3802 | 3790 | 3802 |

Table S99. Energy and optimized coordinates (Å) for phosphinate anion,  $\text{H}_2\text{POO}^-$ .

| $E = -493.203535644 \text{ A.U.}$ |           |           |           |
|-----------------------------------|-----------|-----------|-----------|
| Atom                              | $x$       | $y$       | $z$       |
| P                                 | 0.000000  | 0.000000  | 0.292156  |
| O                                 | 0.000000  | 1.329482  | -0.427315 |
| O                                 | 0.000000  | -1.329482 | -0.427315 |
| H                                 | 1.098528  | 0.000000  | 1.227349  |
| H                                 | -1.098528 | 0.000000  | 1.227349  |

Table S100. Vibrational frequencies ( $\text{cm}^{-1}$ ) for O isotopologues of phosphinate anion,  $\text{H}_2\text{POO}^-$ .

| $^{16}\text{O}_2$ | $\text{P}^{18}\text{O}$ |
|-------------------|-------------------------|
| 442               | 433                     |
| 783               | 779                     |

|      |      |
|------|------|
| 905  | 903  |
| 1039 | 1013 |
| 1068 | 1066 |
| 1158 | 1158 |
| 1224 | 1208 |
| 2137 | 2137 |
| 2206 | 2206 |

Table S101. Energy and optimized coordinates (Å) for phosphonic acid, HP(OH)<sub>2</sub>O.

| $E = -569.047095052$ A.U. |           |           |           |
|---------------------------|-----------|-----------|-----------|
| Atom                      | $x$       | $y$       | $z$       |
| P                         | 0.007661  | 0.105718  | 0.275654  |
| O                         | 0.295864  | 1.459540  | -0.236302 |
| O                         | 1.091262  | -1.007676 | -0.156915 |
| O                         | -1.406016 | -0.537137 | -0.129458 |
| H                         | -0.067247 | -0.065247 | 1.660815  |
| H                         | 1.832321  | -0.607995 | -0.628368 |
| H                         | -1.728868 | -0.230345 | -0.985849 |

Table S102. Vibrational frequencies (cm<sup>-1</sup>) for O isotopologues of phosphonic acid, HP(OH)<sub>2</sub>O, where the designations (1) and (2) represent similar groups that have slightly different ZPEs.

| <sup>16</sup> O <sub>3</sub> | P- <sup>18</sup> OH (1) | P- <sup>18</sup> OH (2) | P= <sup>18</sup> O |
|------------------------------|-------------------------|-------------------------|--------------------|
| 111                          | 110                     | 111                     | 111                |
| 248                          | 247                     | 247                     | 248                |
| 364                          | 359                     | 360                     | 361                |

|      |      |      |      |
|------|------|------|------|
| 400  | 398  | 395  | 392  |
| 467  | 463  | 463  | 462  |
| 847  | 824  | 825  | 843  |
| 895  | 885  | 884  | 895  |
| 939  | 939  | 939  | 938  |
| 987  | 986  | 985  | 986  |
| 1044 | 1041 | 1043 | 1042 |
| 1076 | 1075 | 1073 | 1071 |
| 1289 | 1289 | 1289 | 1252 |
| 2517 | 2517 | 2517 | 2517 |
| 3801 | 3794 | 3789 | 3801 |
| 3806 | 3801 | 3806 | 3806 |

Table S103. Energy and optimized coordinates ( $\text{\AA}$ ) for the hydrogen phosphonate anion,  $\text{HP(OH)O}_2^-$ .

| $E = -568.511481548 \text{ A.U.}$ |           |           |           |
|-----------------------------------|-----------|-----------|-----------|
| Atom                              | $x$       | $y$       | $z$       |
| P                                 | -0.131100 | 0.091032  | 0.218148  |
| O                                 | 0.491971  | 1.397384  | -0.207447 |
| O                                 | 1.010281  | -1.097083 | -0.107043 |
| O                                 | -1.467031 | -0.397307 | -0.253387 |
| H                                 | -0.117515 | 0.028370  | 1.642655  |
| H                                 | 1.802242  | -0.617802 | -0.371854 |

Table S104. Vibrational frequencies ( $\text{cm}^{-1}$ ) for O isotopologues of the hydrogen phosphonate



anion,  $\text{HP}(\text{OH})\text{O}_2^-$ , where the designations (1) and (2) represent similar groups that have slightly different ZPEs.

| $^{16}\text{O}_3$ | P- $^{18}\text{OH}$ | P $^{18}\text{O}$ (1) | P $^{18}\text{O}$ (2) |
|-------------------|---------------------|-----------------------|-----------------------|
| 284               | 281                 | 283                   | 282                   |
| 372               | 367                 | 367                   | 369                   |
| 411               | 407                 | 405                   | 403                   |
| 522               | 519                 | 516                   | 515                   |
| 736               | 712                 | 735                   | 735                   |
| 955               | 954                 | 954                   | 955                   |
| 1000              | 998                 | 997                   | 997                   |
| 1047              | 1045                | 1025                  | 1044                  |
| 1075              | 1074                | 1069                  | 1054                  |
| 1267              | 1267                | 1256                  | 1250                  |
| 2286              | 2285                | 2285                  | 2285                  |
| 3818              | 3806                | 3818                  | 3818                  |

Table S105. Energy and optimized coordinates (Å) for the phosphonate dianion,  $\text{HPO}_3^{2-}$ .

| $E = -567.768301111 \text{ A.U.}$ |           |           |           |
|-----------------------------------|-----------|-----------|-----------|
| Atom                              | $x$       | $y$       | $z$       |
| P                                 | 0.000000  | 0.000000  | 0.175865  |
| O                                 | 0.000000  | 1.505051  | -0.178873 |
| O                                 | 1.303412  | -0.752525 | -0.178873 |
| O                                 | -1.303412 | -0.752525 | -0.178873 |
| H                                 | 0.000000  | 0.000000  | 1.654984  |

Table S106. Vibrational frequencies ( $\text{cm}^{-1}$ ) for O isotopologues of the phosphonate dianion,  $\text{HPO}_3^{=}$ .

| $^{16}\text{O}_3$ | $\text{P}^{18}\text{O}$ |
|-------------------|-------------------------|
| 428               | 417                     |
| 428               | 425                     |
| 540               | 535                     |
| 906               | 887                     |
| 955               | 953                     |
| 955               | 955                     |
| 1057              | 1038                    |
| 1057              | 1056                    |
| 1895              | 1895                    |

Table S107. Energy and optimized coordinates ( $\text{\AA}$ ) for phosphoric acid,  $\text{H}_3\text{PO}_4$ .

| $E = -644.344009049 \text{ A.U.}$ |           |           |           |
|-----------------------------------|-----------|-----------|-----------|
| Atom                              | $x$       | $y$       | $z$       |
| P                                 | 0.000000  | 0.000000  | 0.115540  |
| O                                 | 0.000000  | 0.000000  | 1.588956  |
| O                                 | 0.000000  | 1.435598  | -0.591970 |
| O                                 | 1.243264  | -0.717799 | -0.591970 |
| O                                 | -1.243264 | -0.717799 | -0.591970 |
| H                                 | -0.485878 | 2.091731  | -0.079151 |
| H                                 | 2.054431  | -0.625082 | -0.079151 |
| H                                 | -1.568553 | -1.466648 | -0.079151 |

Table S108. Vibrational frequencies ( $\text{cm}^{-1}$ ) for O isotopologues of phosphoric acid,  $\text{H}_3\text{PO}_4$ .

| $^{16}\text{O}_4$ | P- $^{18}\text{OH}$ | P= $^{18}\text{O}$ |
|-------------------|---------------------|--------------------|
| 159               | 158                 | 158                |
| 159               | 159                 | 158                |
| 296               | 295                 | 296                |
| 368               | 363                 | 364                |
| 368               | 364                 | 364                |
| 444               | 440                 | 441                |
| 451               | 446                 | 445                |
| 451               | 448                 | 445                |
| 826               | 811                 | 820                |
| 912               | 895                 | 912                |
| 912               | 912                 | 912                |
| 1043              | 1040                | 1039               |
| 1047              | 1045                | 1047               |
| 1047              | 1047                | 1047               |
| 1302              | 1301                | 1264               |
| 3817              | 3805                | 3817               |
| 3817              | 3817                | 3817               |
| 3819              | 3819                | 3819               |

Table S109. Energy and optimized coordinates ( $\text{\AA}$ ) for dihydrogen phosphate anion,  $\text{H}_2\text{PO}_4^-$ .

| $E = -643.811123850 \text{ A.U.}$ |          |          |          |
|-----------------------------------|----------|----------|----------|
| Atom                              | $x$      | $y$      | $z$      |
| P                                 | 0.000000 | 0.000000 | 0.167658 |

|   |           |           |           |
|---|-----------|-----------|-----------|
| O | 0.000000  | 1.332462  | 0.854473  |
| O | -1.287657 | -0.014787 | -0.892110 |
| O | 1.287657  | 0.014787  | -0.892110 |
| O | 0.000000  | -1.332462 | 0.854473  |
| H | 1.561876  | 0.934626  | -0.956342 |
| H | -1.561876 | -0.934626 | -0.956342 |

Table S110. Vibrational frequencies ( $\text{cm}^{-1}$ ) for O isotopologues of the dihydrogen phosphate anion,  $\text{H}_2\text{PO}_4^-$ .

| $^{16}\text{O}_4$ | P- $^{18}\text{OH}$ | P $^{18}\text{O}$ |
|-------------------|---------------------|-------------------|
| 197               | 196                 | 197               |
| 312               | 306                 | 309               |
| 314               | 314                 | 314               |
| 378               | 375                 | 373               |
| 422               | 418                 | 417               |
| 485               | 479                 | 478               |
| 490               | 485                 | 484               |
| 745               | 728                 | 742               |
| 771               | 765                 | 771               |
| 1039              | 1035                | 1033              |
| 1056              | 1053                | 1046              |
| 1076              | 1076                | 1063              |
| 1296              | 1296                | 1282              |
| 3830              | 3818                | 3830              |
| 3831              | 3830                | 3831              |

Table S111. Energy and optimized coordinates (Å) for hydrogen phosphate dianion,  $\text{HPO}_4^{2-}$ .

| $E = -643.072524090 \text{ A.U.}$ |           |           |           |  |
|-----------------------------------|-----------|-----------|-----------|--|
| Atom                              | $x$       | $y$       | $z$       |  |
| P                                 | 0.023455  | 0.164723  | 0.000000  |  |
| O                                 | -0.545220 | 0.762864  | 1.295012  |  |
| O                                 | 1.553629  | -0.084458 | 0.000000  |  |
| O                                 | -0.545220 | -1.505583 | 0.000000  |  |
| O                                 | -0.545220 | 0.762864  | -1.295012 |  |
| H                                 | 0.304412  | -1.956335 | 0.000000  |  |

Table S112. Vibrational frequencies ( $\text{cm}^{-1}$ ) for O isotopologues of the hydrogen phosphate dianion,  $\text{HPO}_4^{2-}$ , where the designations (1), (2), and (3) represent similar groups that have slightly different ZPEs.

| $^{16}\text{O}_4$ | P- $^{18}\text{OH}$ | P $^{18}\text{O}$ (1) | P $^{18}\text{O}$ (2) | P $^{18}\text{O}$ (3) |
|-------------------|---------------------|-----------------------|-----------------------|-----------------------|
| 208               | 207                 | 208                   | 208                   | 208                   |
| 326               | 321                 | 321                   | 321                   | 323                   |
| 330               | 324                 | 328                   | 328                   | 324                   |
| 475               | 462                 | 466                   | 466                   | 471                   |
| 479               | 474                 | 475                   | 475                   | 475                   |
| 493               | 490                 | 487                   | 487                   | 484                   |
| 600               | 593                 | 598                   | 598                   | 598                   |
| 912               | 912                 | 898                   | 898                   | 887                   |
| 988               | 984                 | 981                   | 981                   | 983                   |
| 1089              | 1089                | 1073                  | 1073                  | 1089                  |
| 1109              | 1107                | 1107                  | 1107                  | 1102                  |

3817      3805      3817      3817      3817

---

Table S113. Energy and optimized coordinates (Å) for the phosphate trianion,  $\text{PO}_4^{3-}$ .

| $E = -642.144630480 \text{ A.U.}$ |           |           |           |
|-----------------------------------|-----------|-----------|-----------|
| Atom                              | $x$       | $Y$       | $z$       |
| P                                 | 0.000000  | 0.000000  | 0.000000  |
| O                                 | 0.920623  | 0.920623  | 0.920623  |
| O                                 | -0.920623 | -0.920623 | 0.920623  |
| O                                 | -0.920623 | 0.920623  | -0.920623 |
| O                                 | 0.920623  | -0.920623 | -0.920623 |

Table S114. Vibrational frequencies ( $\text{cm}^{-1}$ ) for O isotopologues of the phosphate trianion,  $\text{PO}_4^{3-}$ .

| $^{16}\text{O}_4$ | $\text{P}^{18}\text{O}$ |
|-------------------|-------------------------|
| 338               | 333                     |
| 338               | 333                     |
| 479               | 473                     |
| 479               | 473                     |
| 479               | 474                     |
| 805               | 787                     |
| 837               | 825                     |
| 837               | 837                     |
| 837               | 837                     |

Table S115. Energy and optimized coordinates (Å) for phosphenic acid,  $\text{O}_2\text{POH}$ .

$$E = -567.811846750 \text{ A.U.}$$

| Atom | $x$       | $y$       | $z$      |
|------|-----------|-----------|----------|
| P    | 0.000000  | 0.139260  | 0.000000 |
| O    | -0.228044 | -1.435678 | 0.000000 |
| O    | 1.412258  | 0.536600  | 0.000000 |
| O    | -1.260547 | 0.877839  | 0.000000 |
| H    | 0.610667  | -1.918994 | 0.000000 |

Table S116. Vibrational frequencies ( $\text{cm}^{-1}$ ) for O isotopologues of phosphenic acid,  $\text{O}_2\text{POH}$ , where *cis* and *trans* represent the relationship between the proton and the  $\text{P}=\text{}^{18}\text{O}$  oxygen.

| $^{16}\text{O}_2$ | $\text{C}-^{18}\text{OH}$ | $\text{C}=\text{}^{18}\text{O}$ ( <i>cis</i> ) | $\text{C}=\text{}^{18}\text{O}$ ( <i>trans</i> ) |
|-------------------|---------------------------|------------------------------------------------|--------------------------------------------------|
| 394               | 387                       | 389                                            | 390                                              |
| 422               | 420                       | 418                                            | 418                                              |
| 436               | 433                       | 428                                            | 427                                              |
| 511               | 508                       | 510                                            | 511                                              |
| 887               | 856                       | 881                                            | 881                                              |
| 1043              | 1037                      | 1043                                           | 1040                                             |
| 1174              | 1171                      | 1147                                           | 1154                                             |
| 1444              | 1444                      | 1428                                           | 1423                                             |
| 3765              | 3753                      | 3765                                           | 3765                                             |

Table S117. Energy and optimized coordinates ( $\text{\AA}$ ) for phosphenate anion,  $\text{PO}_3^-$ , the product of deprotonation of phosphenic acid.

$$E = -567.305477200 \text{ A.U.}$$

| Atom | $x$      | $y$      | $z$      |
|------|----------|----------|----------|
| P    | 0.000000 | 0.000000 | 0.000000 |

|   |           |           |          |
|---|-----------|-----------|----------|
| O | 0.000000  | 1.498337  | 0.000000 |
| O | 1.297597  | -0.749168 | 0.000000 |
| O | -1.297597 | -0.749168 | 0.000000 |

Table S118. Vibrational frequencies ( $\text{cm}^{-1}$ ) for O isotopologues of the phosphenate anion,  $\text{PO}_3^-$ , the product of deprotonation of phosphenic acid.

| $^{16}\text{O}_3$ | $\text{P}^{18}\text{O}$ |
|-------------------|-------------------------|
| 469               | 457                     |
| 469               | 466                     |
| 469               | 466                     |
| 989               | 968                     |
| 1254              | 1230                    |
| 1254              | 1254                    |

**Reliability of Calculations.** Before drawing any conclusions, the reliability of the calculated EIEs must be examined. This can be done by comparing the EIEs calculated here with the EIEs determined experimentally for some fully  $^{18}\text{O}$ -labeled acids. The comparisons are presented in Table S119. Because the calculated EIEs in Table 5 are for mono- $^{18}\text{O}$ -labeled acids, it is necessary to compare the product of all those EIEs with the experimental EIEs of fully  $^{18}\text{O}$ -labeled acids. For formic, formic-*d*, and acetic acids this EIE is the product of the  $1^\circ$  and  $2^\circ\text{C}=\text{O}$  EIEs. Calculating the EIE for fully  $^{18}\text{O}$ -labeled dihydrogen phosphate anion, with its four  $^{18}\text{O}$  labels, requires taking the product of  $1^\circ$ , one  $2^\circ\text{OH}$ , and two  $2^\circ\text{P}=\text{O}$  EIEs. Similarly, calculating the EIE for the fully  $^{18}\text{O}$ -labeled hydrogen phosphate dianion requires taking the product of one  $1^\circ$  and three  $2^\circ\text{P}=\text{O}$  EIEs.

Table S119. Experimentally measured EIEs on acidities of various fully  $^{18}\text{O}$ -labeled acids compared to the product of the calculated primary and secondary EIEs.

| $^{18}\text{O}$ Acid               | $K_a^{16}/K_a^{18}$   | $1^\circ \prod 2^\circ$ |
|------------------------------------|-----------------------|-------------------------|
| $\text{HC}^{18}\text{O}_2\text{H}$ | $1.0222 \pm 0.0002^a$ | 1.0294                  |
| $\text{HC}^{18}\text{O}_2\text{D}$ | $1.0291 \pm 0.0001^a$ | 1.0363                  |



|                                                            |                              |        |
|------------------------------------------------------------|------------------------------|--------|
| CH <sub>3</sub> C <sup>18</sup> O <sub>2</sub> H           | 1.0172 ± 0.0004 <sup>b</sup> | 1.0257 |
| H <sub>2</sub> P <sup>18</sup> O <sub>4</sub> <sup>-</sup> | 1.019 ± 0.001 <sup>c</sup>   | 1.0489 |
| HP <sup>18</sup> O <sub>4</sub> <sup>2-</sup>              | 1.019 ± 0.001 <sup>c</sup>   | 1.0556 |

<sup>a</sup>Ref. <sup>9</sup> <sup>b</sup>Ref. <sup>10</sup> <sup>c</sup>Ref. <sup>11</sup>.

The calculated EIEs with only two <sup>18</sup>O labels—formic, formic-*d*, and acetic acid—are similar to the experimental values, but overshoot the actual value. For the acids with four <sup>18</sup>O labels—dihydrogen phosphate anion and hydrogen phosphate dianion—the calculated EIEs are much larger than their experimental counterparts. This may be due to solvation playing a larger role in the di- and tri-anions. Despite this discrepancy, the computational values are good representatives of the experimental EIEs.

Another way to assess the reliability of these calculations is to verify that they reproduce values of  $Q^{18}/Q^{16}$  calculated previously on the basis of experimental vibrational frequencies using eq S3, including the EXC factor. Table S120 compares our values with those obtained by Urey at 273K.<sup>12</sup> The agreement is quite close, and the difference for CO<sub>3</sub><sup>2-</sup> can be attributed to the difficulty in estimating frequencies for an ion.

Table S120.  $Q^{18}/Q^{16}$  for select species.

| Species                       | this work | Ref. 12 |
|-------------------------------|-----------|---------|
| H <sub>2</sub> O              | 1.0658    | 1.0667  |
| CO <sub>2</sub>               | 1.1201    | 1.1172  |
| CO <sub>3</sub> <sup>2-</sup> | 1.0805    | 1.0945  |

Errors can also arise from incomplete convergence in the calculations, despite the imposition of a very tight optimized geometry and an ultrafine optimization grid. Errors can be manifested as small differences in degenerate vibrational frequencies that ought to be identical. Species exhibiting degenerate frequencies include CO<sub>3</sub><sup>2-</sup>, NO<sub>3</sub><sup>-</sup>, BH<sub>3</sub>, HB(OH)<sub>3</sub><sup>-</sup>, B(OH)<sub>3</sub>, H<sub>3</sub>PO<sub>4</sub>, PO<sub>3</sub><sup>-</sup>, CO<sub>2</sub>, B(OH)<sub>4</sub><sup>-</sup>, and PO<sub>4</sub><sup>3-</sup>, each of which has a three-fold or higher axis of symmetry. The species with a four-fold axis of symmetry or higher, CO<sub>2</sub>, B(OH)<sub>4</sub><sup>-</sup>, and PO<sub>4</sub><sup>3-</sup>, have degenerate frequencies that are calculated to be identical within 0.0001 cm<sup>-1</sup>. The species with the largest error is CO<sub>3</sub><sup>2-</sup>, which shows a 0.08-cm<sup>-1</sup> variation in its 1296 cm<sup>-1</sup> mode. This is too small to appear in the rounded off values in Table S43. It translates to a possible error of ±1.0002 in the EIE, large enough to affect the values in Tables 5 and 6, but still too small to have any impact on the comparison of 1° with 2° EIEs. These results indicate that the convergence errors obtained in these calculations do not substantially affect the EIEs obtained.

Other errors in the calculations can arise from inadequacy of the basis set, but the

agreement in Table S119 between experimental and calculated EIEs suggests that the basis set is adequate, as had been found.<sup>13</sup>

**Inclusion of the EXC Factor.** Tables S121 and S122 present the EIEs calculated with the full eq S3.

Table S121. Calculated  $^{18}\text{O}$  EIEs on deprotonation of various mono- $^{18}\text{O}$ -substituted carbon-, nitrogen-, boron-, and phosphorus-containing acids using eq S3 at 298.15 K.

| Name                  | Acid                               | Base                               | 1°     | 2° $\text{X}=\text{O}$ | 2° $\text{X}-\text{OH}$ |
|-----------------------|------------------------------------|------------------------------------|--------|------------------------|-------------------------|
| Formic                | HCOOH                              | $\text{HCO}_2^-$                   | 1.0135 | 1.0181                 | —                       |
| Formic <sup>a</sup>   | HCOOH                              | $\text{HCO}_2^-$                   | 1.0137 | 1.0159                 | —                       |
| Formic <sup>b</sup>   | HCOOH                              | $\text{HCO}_2^-$                   | 1.0132 | 1.0152                 | —                       |
| Formic·H <sup>+</sup> | $\text{HC}(\text{OH})_2^+$         | HCOOH                              | 1.0183 | —                      | 1.0256                  |
| Acetic                | $\text{CH}_3\text{COOH}$           | $\text{CH}_3\text{CO}_2^-$         | 1.0100 | 1.0170                 | —                       |
| Carbonic              | $\text{H}_2\text{CO}_3$            | $\text{HCO}_3^-$                   | 1.0111 | 1.0130                 | 1.0264                  |
| Bicarbonate           | $\text{HCO}_3^-$                   | $\text{CO}_3^{2-}$                 | 1.0052 | 1.0204                 | —                       |
| Nitrous               | HONO                               | $\text{NO}_2^-$                    | 1.0016 | 1.0288                 | —                       |
| Nitrous <sup>a</sup>  | HONO                               | $\text{NO}_2^-$                    | 1.0017 | 1.0262                 | —                       |
| Nitric                | $\text{HNO}_3$                     | $\text{NO}_3^-$                    | 0.9982 | 1.0184                 | —                       |
| Nitric <sup>a</sup>   | $\text{HNO}_3$                     | $\text{NO}_3^-$                    | 0.9991 | 1.0159                 | —                       |
| Borinic               | $\text{H}_2\text{BOH}$             | $\text{H}_2\text{BO}^-$            | 1.0235 | —                      | —                       |
| Boronic               | $\text{HB}(\text{OH})_2$           | $\text{HB}(\text{OH})\text{O}^-$   | 1.0183 | —                      | 1.0199                  |
| Boric                 | $\text{B}(\text{OH})_3$            | $\text{B}(\text{OH})_2\text{O}^-$  | 1.0194 | —                      | 1.0140                  |
| Phosphinic            | $\text{H}_2\text{POOH}$            | $\text{H}_2\text{PO}_2^-$          | 1.0062 | 1.0090                 | —                       |
| Phosphonic            | $\text{HP}(\text{OH})_2\text{O}$   | $\text{HP}(\text{OH})\text{O}_2^-$ | 1.0044 | 1.0079                 | 1.0118                  |
| Hydrogen phosphonate  | $\text{HP}(\text{OH})\text{O}_2^-$ | $\text{HPO}_3^{2-}$                | 1.0054 | 1.0128                 | —                       |
| Phosphoric            | $\text{H}_3\text{PO}_4$            | $\text{H}_2\text{PO}_4^-$          | 1.0063 | 1.0064                 | 1.0129                  |
| Dihydrogen Phosphate  | $\text{H}_2\text{PO}_4^-$          | $\text{HPO}_4^{2-}$                | 1.0060 | 1.0126                 | 1.0166                  |
| Hydrogen phosphate    | $\text{HPO}_4^{2-}$                | $\text{PO}_4^{3-}$                 | 1.0063 | 1.0169                 | —                       |
| Phosphenic            | $\text{O}_2\text{POH}$             | $\text{PO}_3^-$                    | 1.0091 | 1.0093                 | —                       |

<sup>a</sup>with PCM for solvation by  $\text{CHCl}_3$ . <sup>b</sup>with PCM for solvation by  $\text{H}_2\text{O}$ .

Table S122. Calculated  $^{18}\text{O}$  EIEs at 298.15 K for  $\text{H}_2\text{O}$  addition to various carbon, nitrogen, boron, and phosphorus-containing Lewis acids using eq S3 at 298.15 K.

| Name | Acid | Base | 1° | 2° $\text{X}=\text{O}$ | 2° $\text{X}-\text{OH}$ |
|------|------|------|----|------------------------|-------------------------|
|------|------|------|----|------------------------|-------------------------|

|                             |                              |                                                |        |        |        |
|-----------------------------|------------------------------|------------------------------------------------|--------|--------|--------|
| Carbon Dioxide              | CO <sub>2</sub>              | HCO <sub>3</sub> <sup>-</sup>                  | 0.9813 | 1.0159 | —      |
| Carbon Dioxide <sup>a</sup> | CO <sub>2</sub>              | HCO <sub>3</sub> <sup>-</sup>                  | 0.9727 | 1.0166 | —      |
| Carbon Dioxide <sup>b</sup> | CO <sub>2</sub>              | HCO <sub>3</sub> <sup>-</sup>                  | 0.9695 | 1.0172 | —      |
| Nitrosonium                 | NO <sup>+</sup>              | HONO                                           | 0.9862 | 1.0267 | —      |
| Nitrosonium <sup>a</sup>    | NO <sup>+</sup>              | HONO                                           | 0.9839 | 1.0296 | —      |
| Nitronium                   | NO <sub>2</sub> <sup>+</sup> | HNO <sub>3</sub>                               | 0.9778 | 1.0183 | —      |
| Borane                      | BH <sub>3</sub>              | H <sub>3</sub> BOH <sup>-</sup>                | 0.9940 | —      | —      |
| Borinic                     | H <sub>2</sub> BOH           | H <sub>2</sub> B(OH) <sub>2</sub> <sup>-</sup> | 0.9901 | —      | 1.0218 |
| Boronic                     | HB(OH) <sub>2</sub>          | HB(OH) <sub>3</sub> <sup>-</sup>               | 0.9876 | —      | 1.0207 |
| Boric                       | B(OH) <sub>3</sub>           | B(OH) <sub>4</sub> <sup>-</sup>                | 0.9811 | —      | 1.0166 |
| Phosphenic                  | O <sub>2</sub> POH           | H <sub>2</sub> PO <sub>4</sub> <sup>-</sup>    | 1.0206 | 1.0509 | 1.0523 |

<sup>a</sup>with PCM for solvation by CHCl<sub>3</sub>. <sup>b</sup>with PCM for solvation by H<sub>2</sub>O.

**Effect of Solvation.** The effect of solvent was assessed using the PCM for solvation by chloroform and water. According to the results in Table 5, the 1° EIEs are nearly the same with the PCM as in the gas phase. The 2° X=O EIEs experience a decrease with solvation, resulting in values that are closer to unity, although still greater than the 1° EIEs. The solvation effect on the individual vibrational frequencies can be measured by  $\Delta\Delta\nu$ , as defined in eq S9, where  $\nu_{16}$  represents a vibrational frequency of the unlabeled species,  $\nu_{18}$  represents a vibrational frequency of the 1° or 2° mono-<sup>18</sup>O labeled species for either the gas phase or in solvent. Table S123 lists  $\Delta\Delta\nu$  values for nitrous acid, expressing the change of the isotope effect on vibrational frequencies on going from gas phase (Table S51) to chloroform (Table S53).

$$\Delta\Delta\nu = (\nu_{16} - \nu_{18})_{\text{gas}} - (\nu_{16} - \nu_{18})_{\text{PCM}} \quad (11)$$

Table S123. Changes in vibrational frequencies,  $\Delta\Delta\nu$ , for 1° and 2° EIEs of nitrous acid between gas phase and chloroform

| Mode | $\Delta\Delta\nu_{1^\circ}$ | $\Delta\Delta\nu_{2^\circ}$ |
|------|-----------------------------|-----------------------------|
| Bend | -0.2                        | -1.0                        |
| Bend | -0.3                        | 0.0                         |
| N-O  | -0.9                        | 0.5                         |
| Bend | 0.1                         | 0.3                         |
| N=O  | -0.2                        | 1.2                         |

|     |      |     |
|-----|------|-----|
| O–H | 0.9  | 0.0 |
| Sum | –0.6 | 1.0 |

According to the results in Table 6, the effect of solvation is that the 1° EIE for Lewis acids deviates even more from unity (becomes more inverse), while the 2° EIE remains largely unchanged. As without solvation, the magnitudes of the 1° EIEs are greater than the magnitudes of the 2° EIEs.

The calculated EIEs in Table S119 overestimate the experimental values. This is a common phenomenon because these calculations are gas-phase and ignore solvation, but solvation can be modeled with the polarized continuum model (PCM). The product of the computed 1° and 2° EIEs for solvated formic acid in Table 5 can be compared with the experimental EIE. This results in overall EIEs of 1.0275 for chloroform and 1.0263 for water, which are closer to the experimental EIE (1.0222) than are the gas phase calculations (1.0294). However, the PCM values are still quite different from the experimental value. Likewise, the solvation effects on the calculated EIEs on the Brønsted acidity of nitrous acid in Table 5 or on the Lewis acidity of nitrosonium cation in Table 6 are small. Even though vibrational frequencies do change with solvation, as seen by comparing Tables S51 and S53,  $\Delta\Delta\nu$ , the isotope effect on the changes of vibrational frequency in Table 6, is quite small and is associated with bending modes. Consequently it is impossible to attribute the solvent effect to specific vibrations.

---

## References

1. Complete Ref. 43: Frisch, M. J.; Trucks, G. W.; Schlegel, H. B.; Scuseria, G. E.; Robb, M. A.; Cheeseman, J. R.; Montgomery Jr., J. A.; Vreven, T.; Kudin, K. N.; Burant, J. C.; Millam, J. M.; Iyengar, S. S.; Tomasi, J.; Barone, V.; Mennucci, B.; Cossi, M.; Scalmani, G.; Rega, N.; Petersson, G. A.; Nakatsuji, H.; Hada, M.; Toyota, K.; Ehara, M.; Fukuda, R.; Hasegawa, J.; Ishida, M.; Nakajima, T.; Honda, Y.; Kitao, O.; Nakai, H.; Klene, M.; Li, X.; Knox, J. E.; Hratchian, H. P.; Cross, J. B.; Bakken, V.; Adamo, C.; Jaramillo, J.; Gomperts, R.; Stratmann, R. E.; Yazyev, O.; Austin, A. J.; Cammi, R.; Pomelli, C.; Ochterski, J. W.; Ayala, P. Y.; Morokuma, K.; Voth, G. A.; Salvador, P.; Dannenberg, J. J.; Zakrzewski, V. G.; Dapprich, S.; Daniels, A. D.; Strain, M. C.; Farkas, O.; Malick, D. K.; Rabuck, A. D.; Raghavachari, K.; Foresman, J. B.; Ortiz, J. V.; Cui, Q.; Baboul, A. G.; Clifford, S.; Cioslowski, J.; Stefanov, B. B.; Liu, G.; Liashenko, A.; Piskorz, P.; Komaromi, I.; Martin, R. L.; Fox, D. J.; Keith, T.; Al-Laham, M. A.; Peng, C. Y.; Nanayakkara, A.; Challacombe, M.; Gill, P. M. W.; Johnson, B.; Chen, W.; Wong, M. W.; Gonzalez, C.; Pople, J. A. *Gaussian 03, Revision D.01* Gaussian, Inc.: Wallingford, CT, 2004.
2. Bigeleisen, J.; Mayer, M. G. *J. Chem. Phys.* **1947**, *15*, 261-267.
3. Wilson, E. B., Jr.; Decius, J. C.; Cross, P. C. *Molecular Vibrations*; Mc-Graw-Hill, New York **1955**, p. 183f.

- 
4. NIST Computational Chemistry Comparison and Benchmark Database, NIST Standard Reference Database Number 101, Release 15b, August 2011, Russell D. Johnson III, Ed. <http://cccbdb.nist.gov/geometries.asp>.
  5. Scott, A. P.; Radom, L. *J. Phys. Chem.* **1996**, *100*, 16502-16513.
  6. Mikhailov, B. M.; Vaver, V. A. *Zhur.Obshch. Khim.* **1959**, *29*, 2248-53, via *Chem. Abs.***1960**, *54*, 56332.
  7. Hogeveen, H.; Bickel, A. F.; Hilbers, C. W.; Mackor, E. L.; MacLean, C. *Chem. Comm.***1966**, 898-899. Ros, P. *J. Chem. Phys.* **1968**, *49*, 4902-4916.
  8. Montanari, B.; Ballone, P.; Jones, R. O. *Macromolecules* **1999**, *32*, 3396-3404. Reisenauer, H. P.; Wagner, J. P.; Schreiner, P. R. *Angew. Chem. Int. Ed.* **2014**, *53*, 11766-11771.
  9. Ellison, S. L. R.; Robinson, M. J. T. *J. Chem. Soc. Chem. Commun.* **1983**, 745-746.
  10. Pehk, T.; Kiirend, E.; Lippmaa, E. *J. Chem. Soc. Perkin Trans. 2* **1997**, 445-450.
  11. Knight, W. B.; Weiss, P. M.; Cleland, W. W. *J. Am. Chem. Soc.* **1986**, *108*, 2759-2761.
  12. Urey, H. C. *J. Chem. Soc.* **1947**, 562-581.
  13. Van Mourik, T.; Wilson, A. K.; Dunning, J. T. H. *Mol. Phys.* **1999**, *96*, 529-547. Toomsalu, E.; Koppel, I. A.; Burk, P. *J. Chem. Theory Comput.* **2013**, *9*, 3947-3958. Balci, K.; Akyuz, S. *Vib. Spectrosc.* **2008**, *48*, 215-228.
